# Supplementary material for: Selective synthesis of gem-dihalopiperidines and 4-halo-1,2,3,6-tetrahydropyridines from halogen substituted homoallylic benzenesulfonamides and aldehydes
Source: Royal Society of Chemistry journal article supplement (doi:10.1039/d5ra03630e), 2025-01-01

# **Selective Synthesis of gem-Dihalopiperidines and 4-halo-1,2,3,6-tetrahydropyridines from halogen substituted homoallylic benzenesulfonamide and aldehyde**

Surjya Kumar Bora and Anil K. Saikia\*

Department of Chemistry, Indian Institute of Technology Guwahati, Guwahati 781039, India

E-mail: [asaikia@iitg.ac.in](mailto:asaikia@iitg.ac.in)

## **Table of Contents:**

|                                      |               |
|--------------------------------------|---------------|
| 1. HRMS spectra of all new compounds | <b>S2-S36</b> |
|--------------------------------------|---------------|

## HRMS spectrum of **3aa**

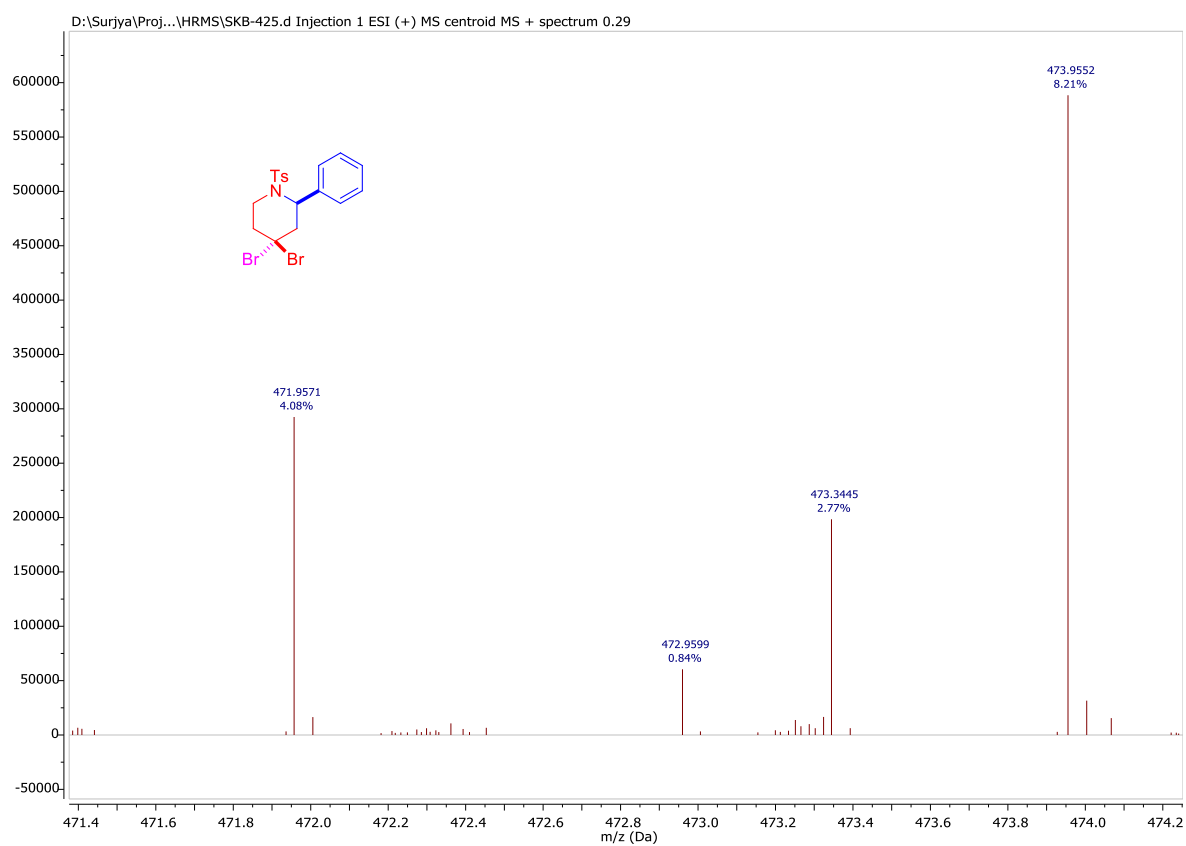

# HRMS spectrum of **3ab**

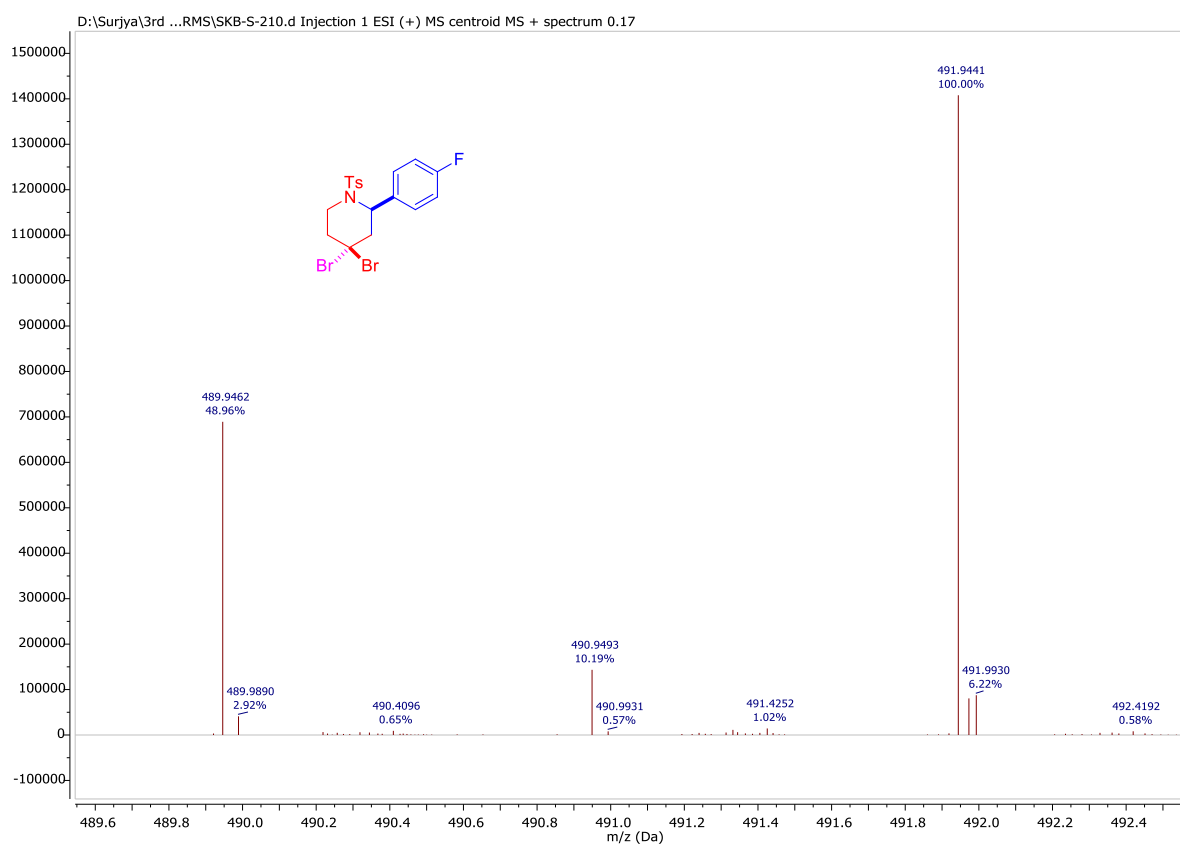

## HRMS spectrum of **3ac**

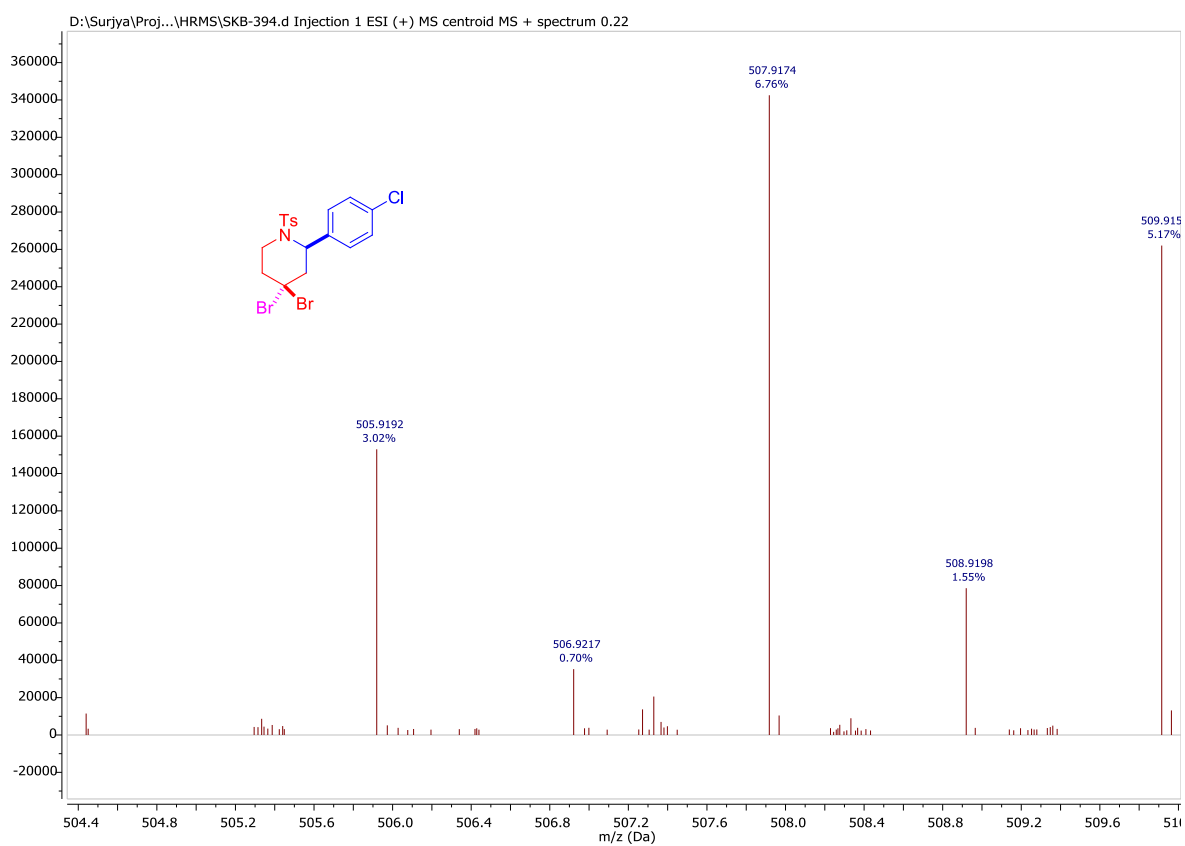

## HRMS spectrum of **3ad**

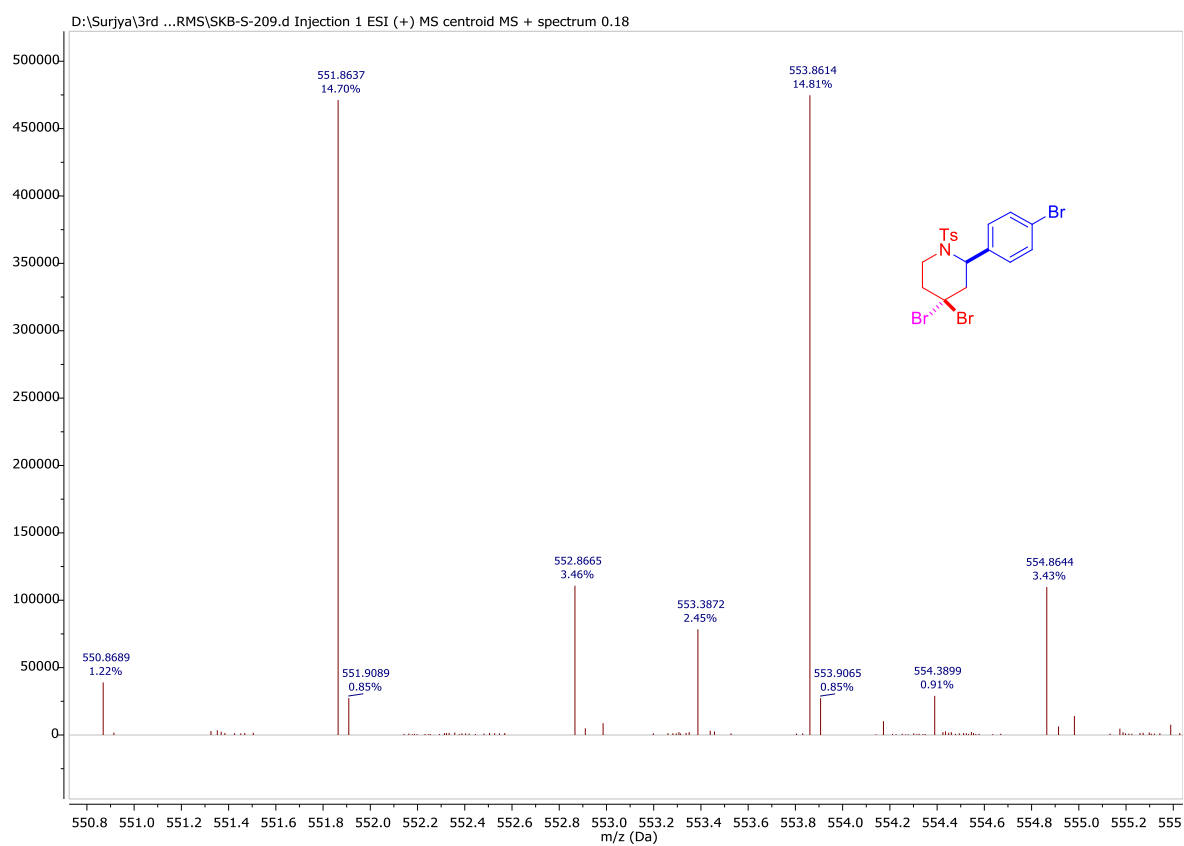

# HRMS spectrum of **3ae**

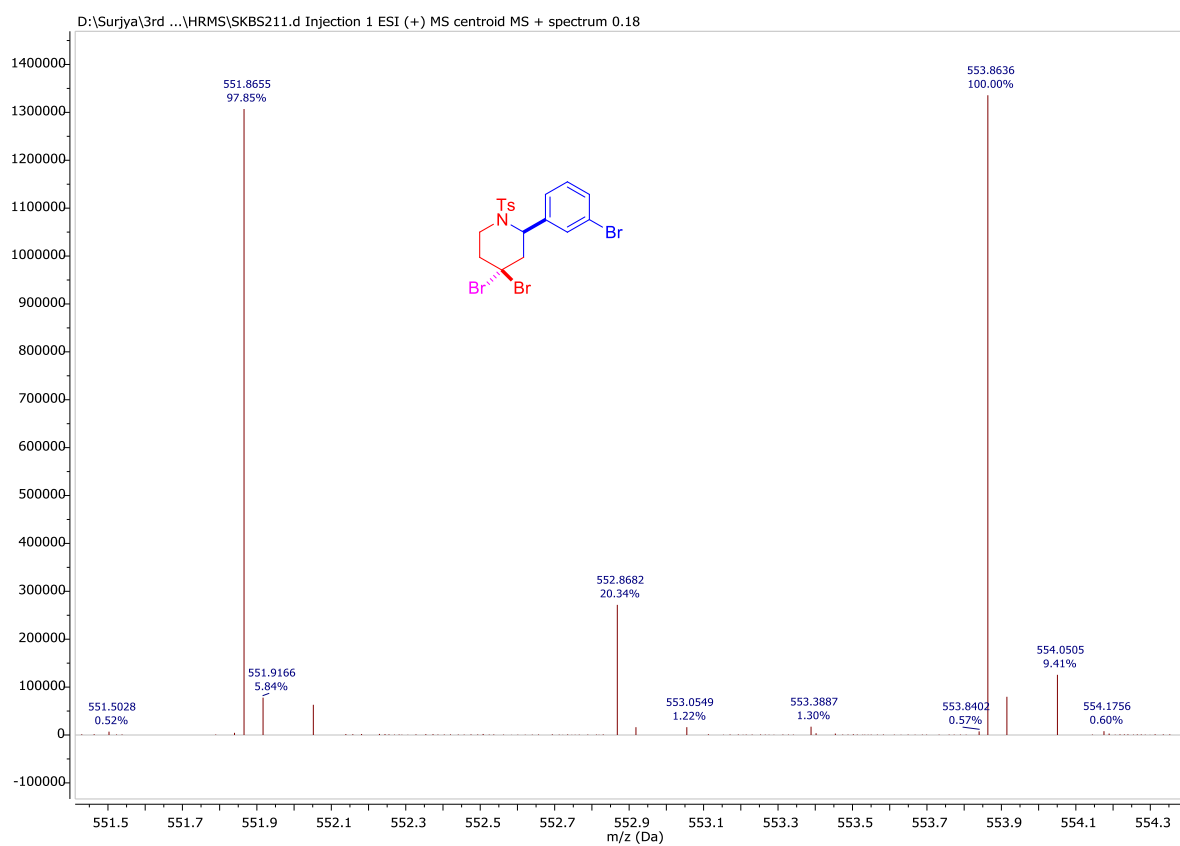

## HRMS spectrum of **3af**

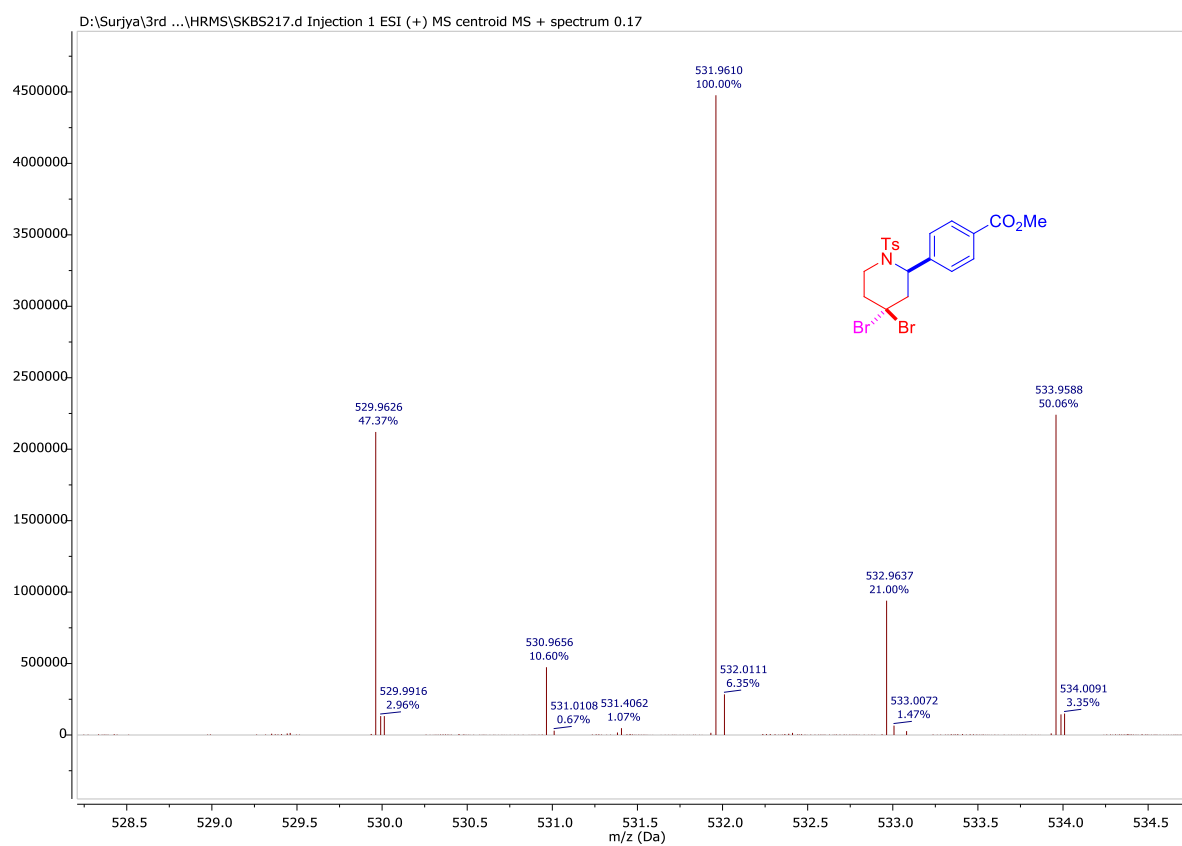

## HRMS spectrum of **3ag**

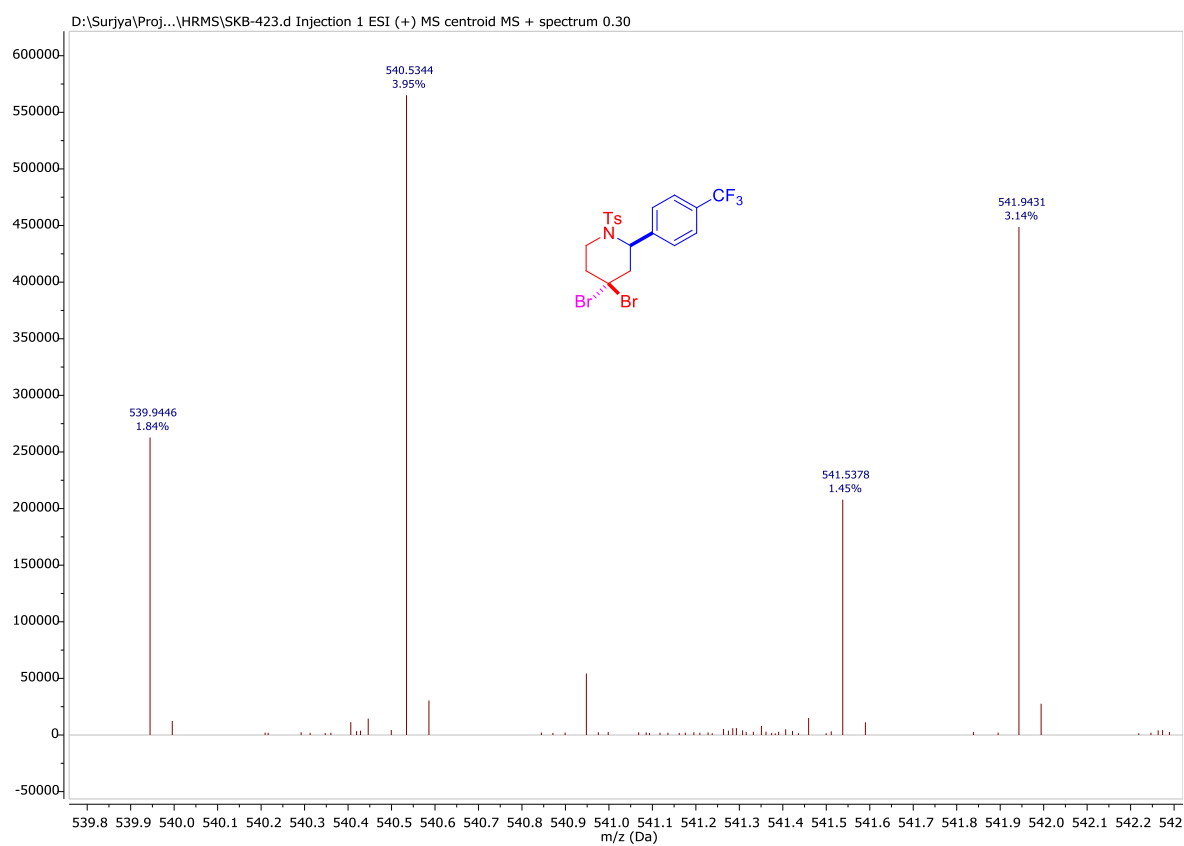



## HRMS spectrum of **3ah**

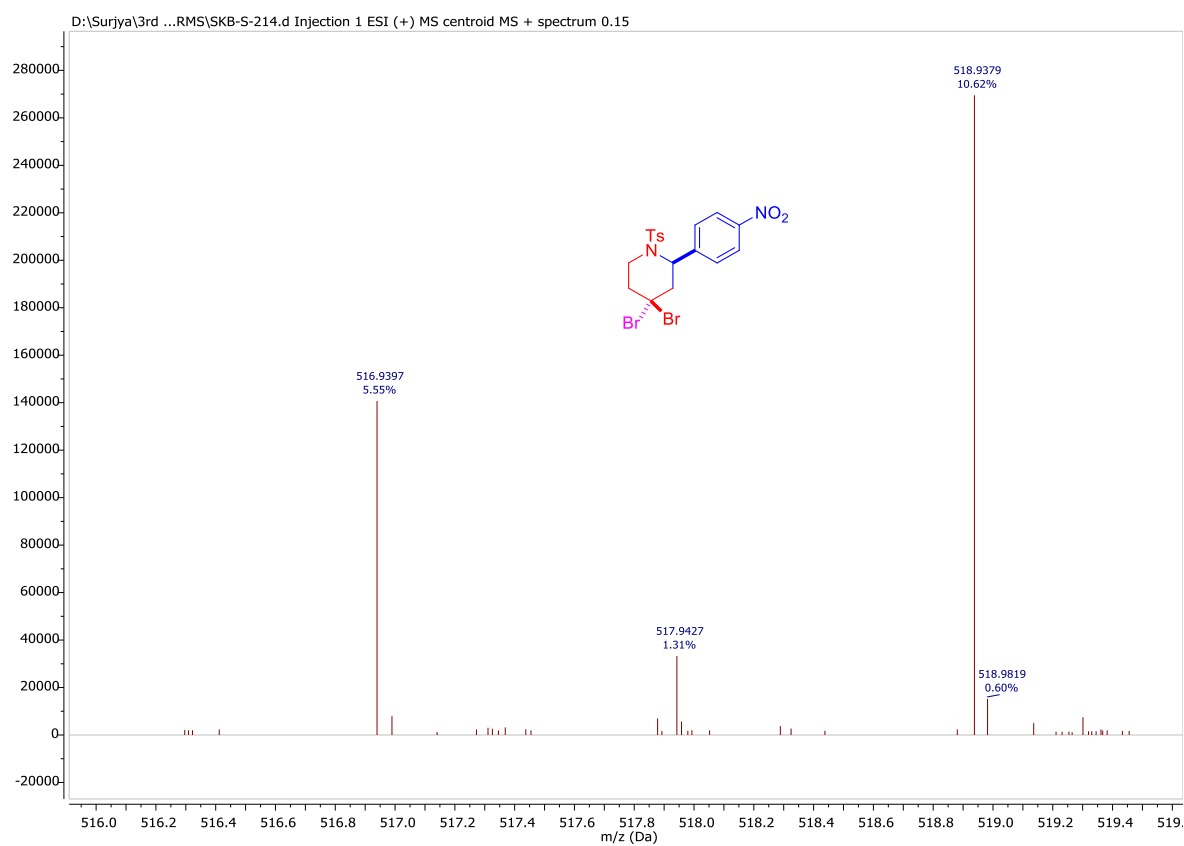

## HRMS spectrum of **3ai**

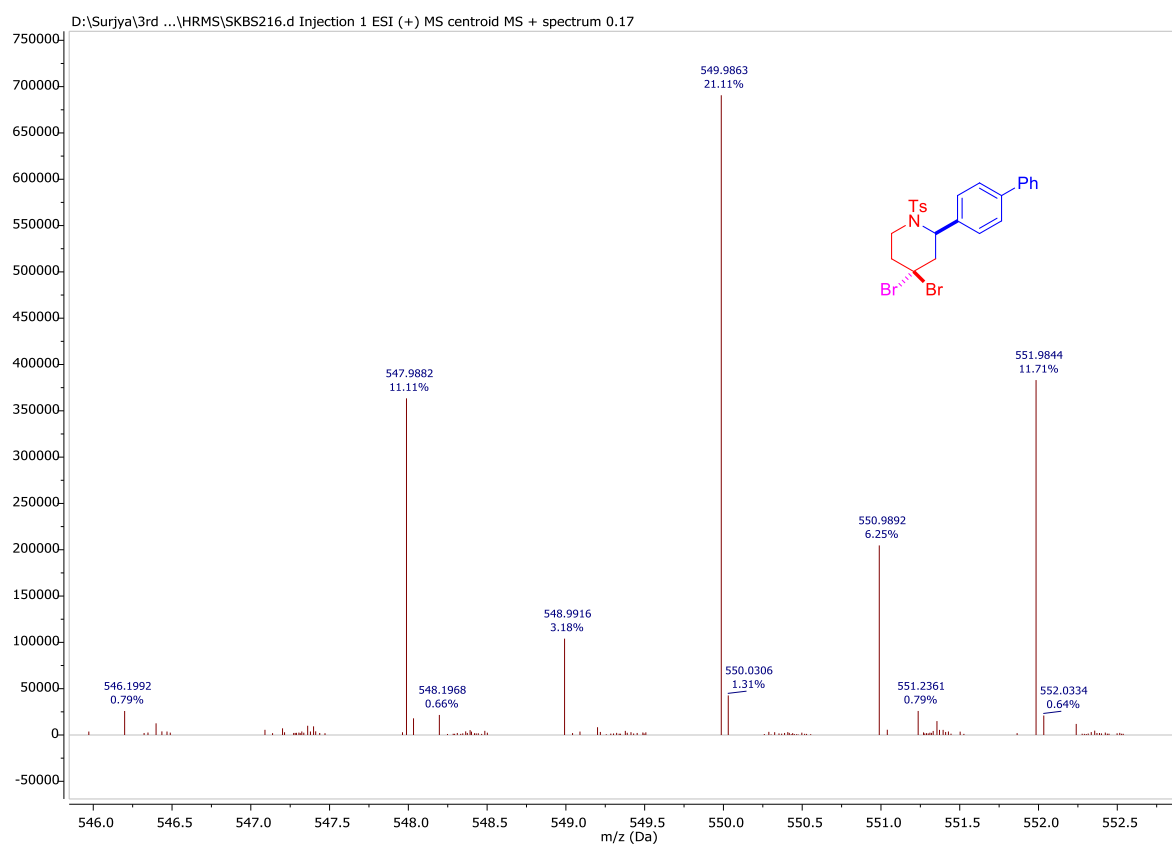

## HRMS spectrum of **3aj**

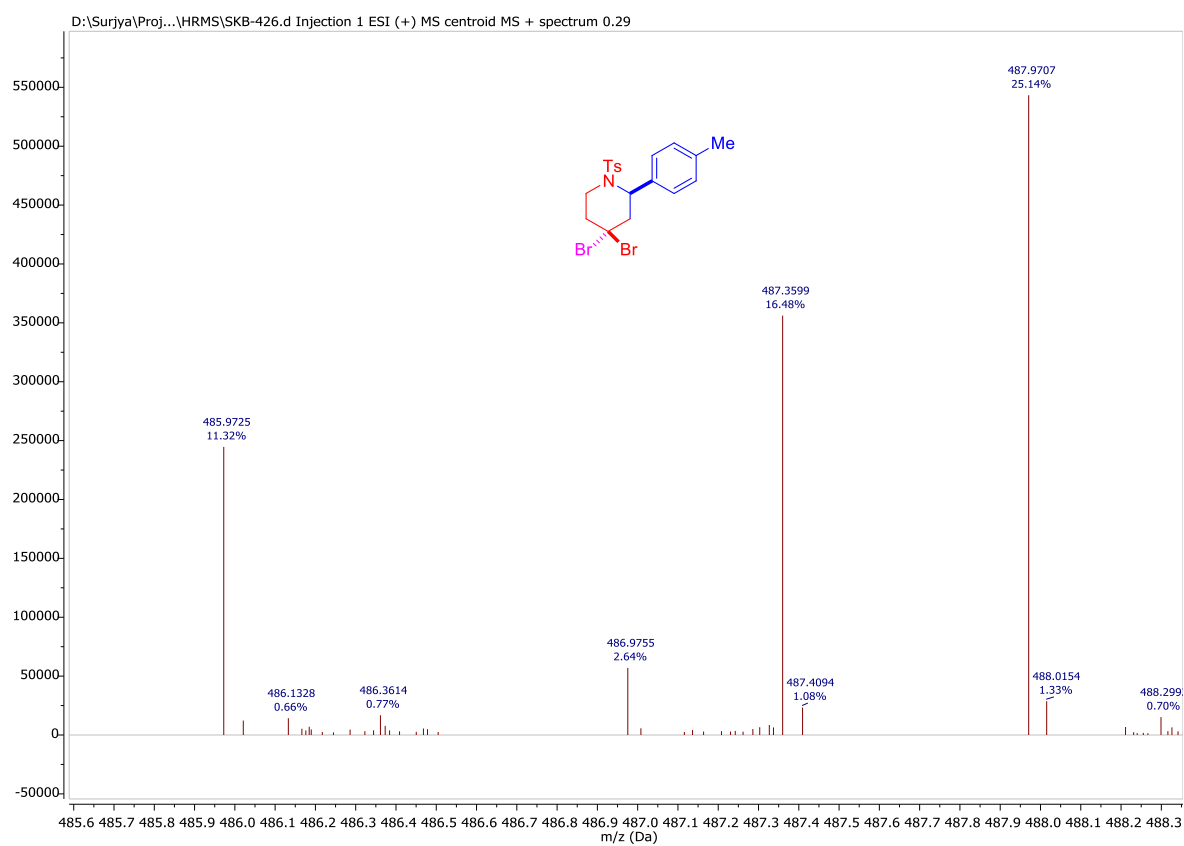

### HRMS spectrum of **3a**

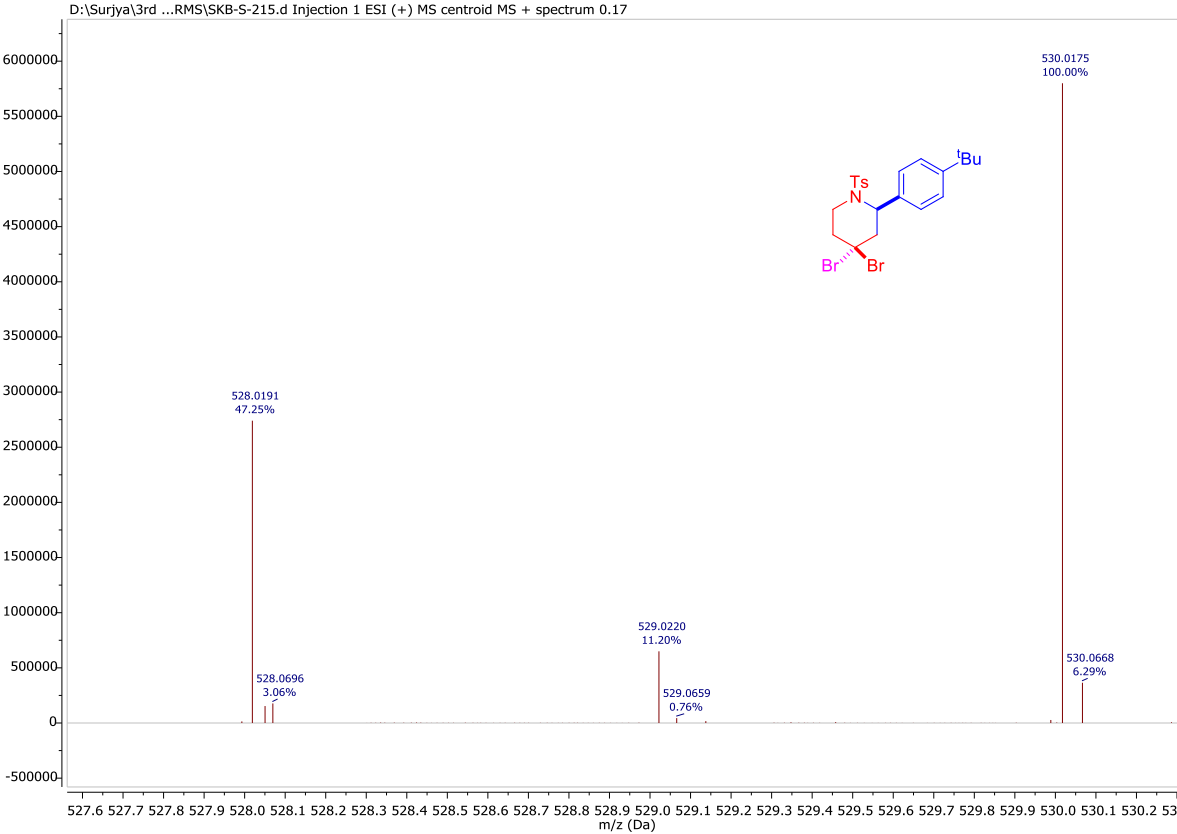

## HRMS spectrum of **3am**

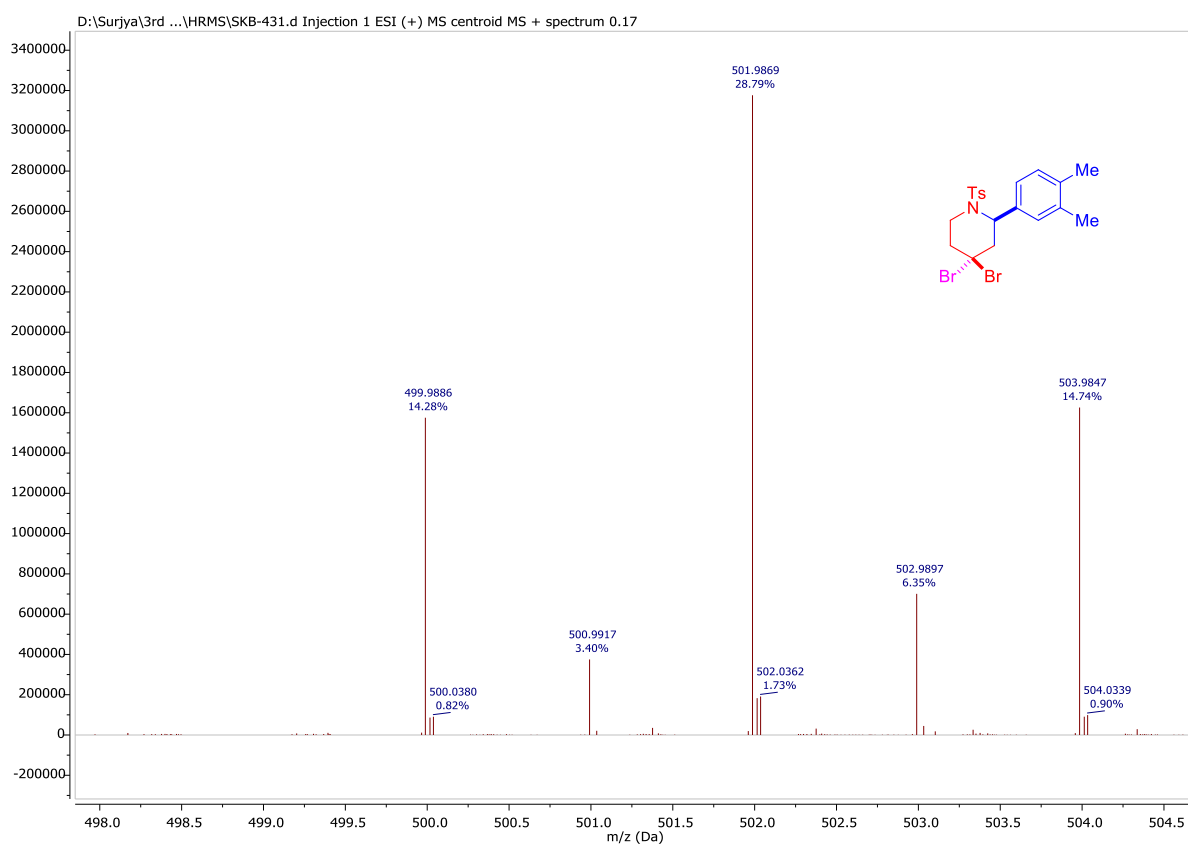

# HRMS spectrum of **3an**

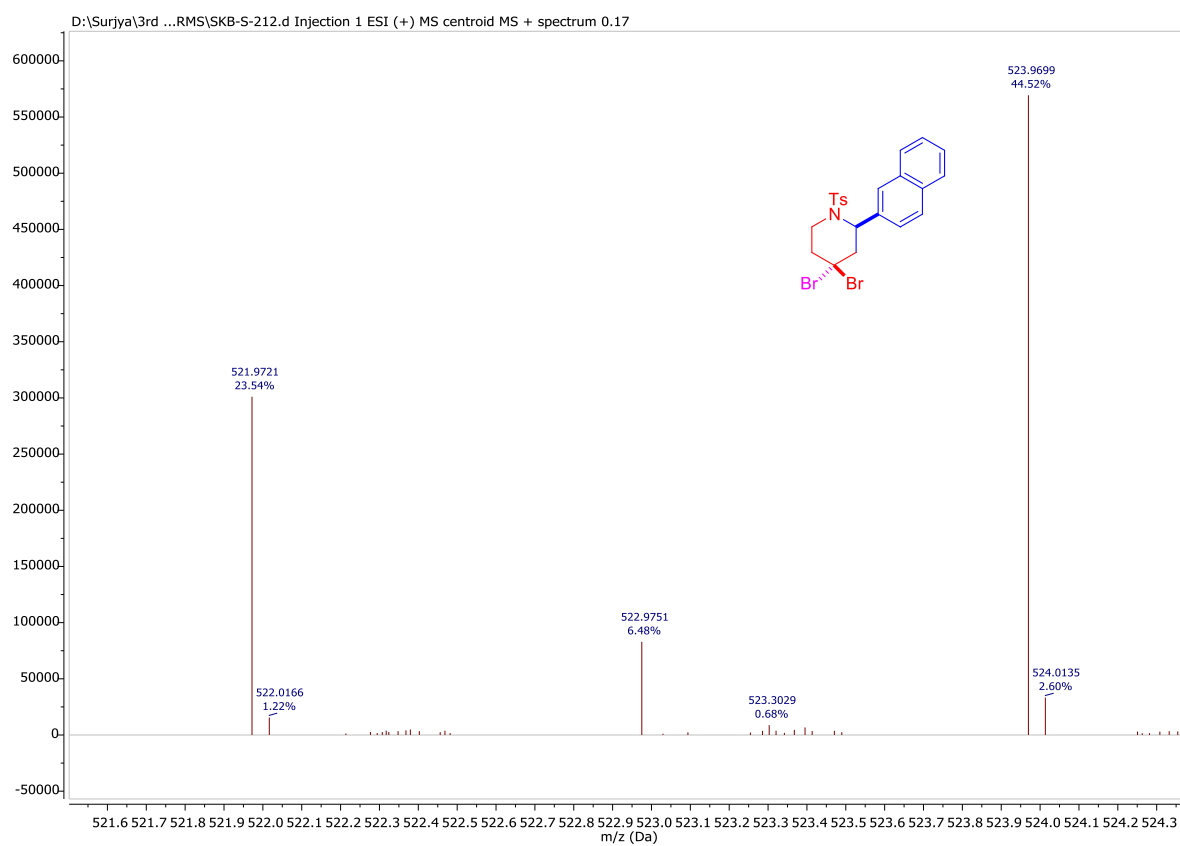

## HRMS spectrum of **3ao**

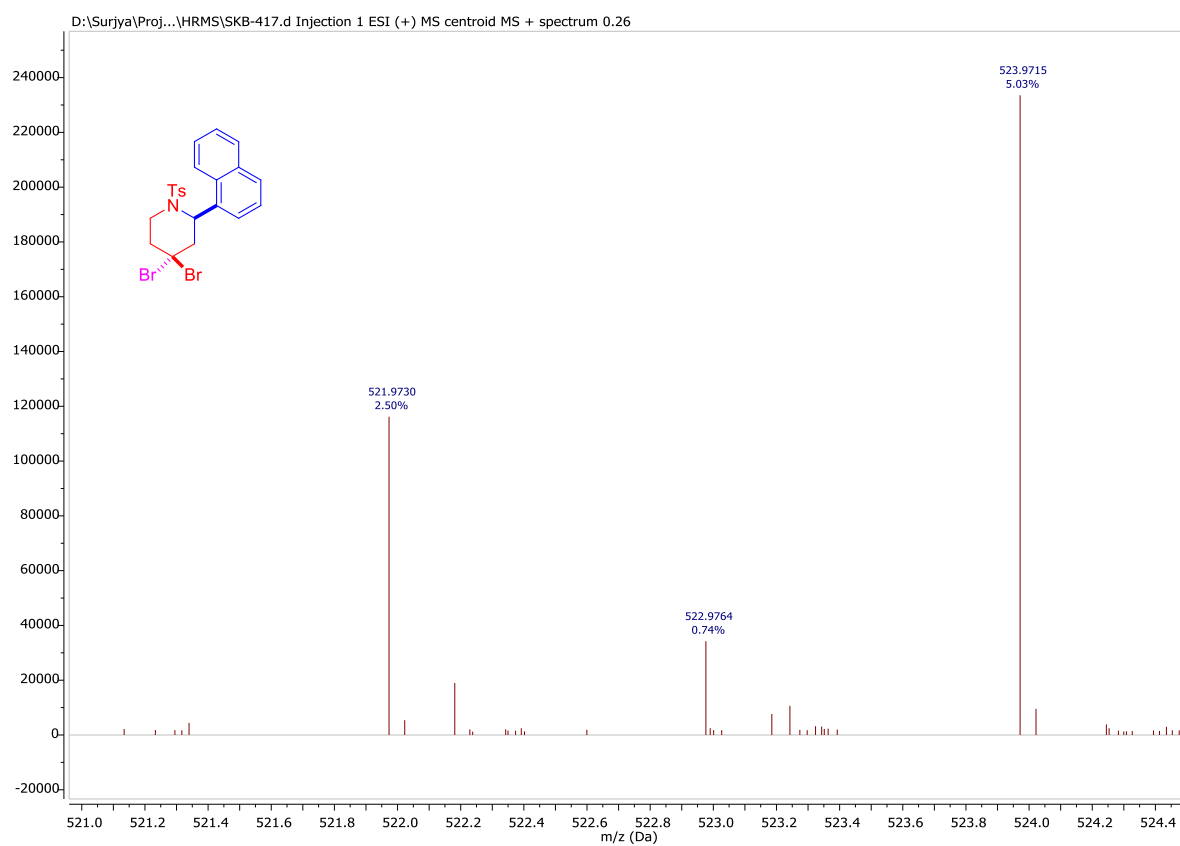

# HRMS spectrum of **3ap**

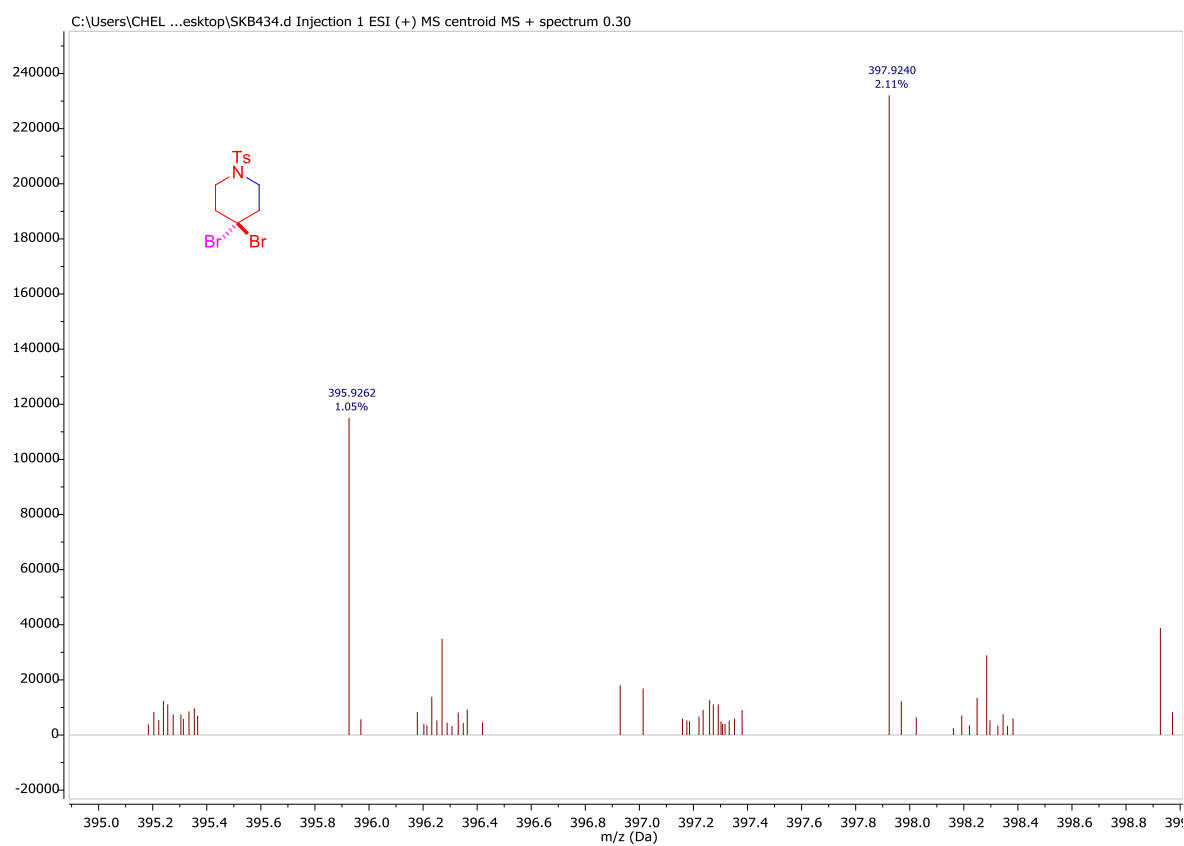



# HRMS spectrum of **3aq**

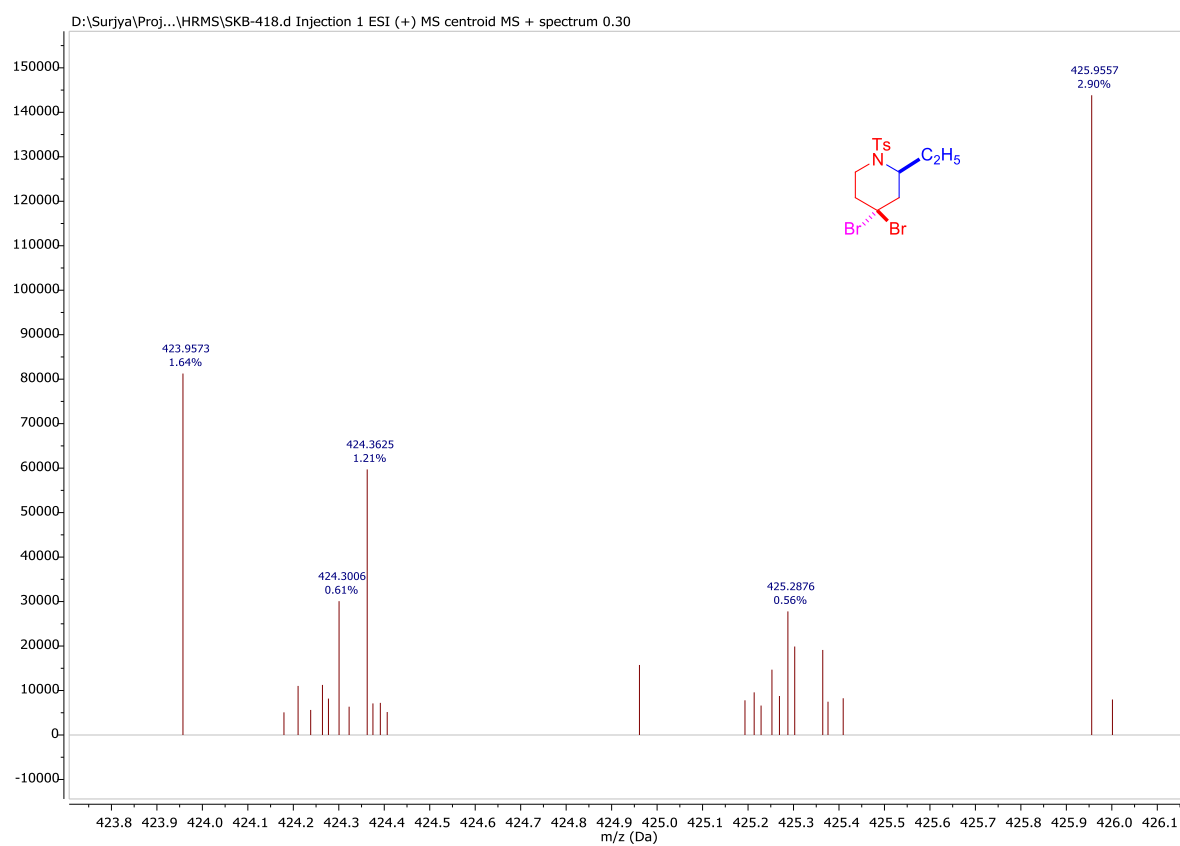

# HRMS spectrum of **3ar**

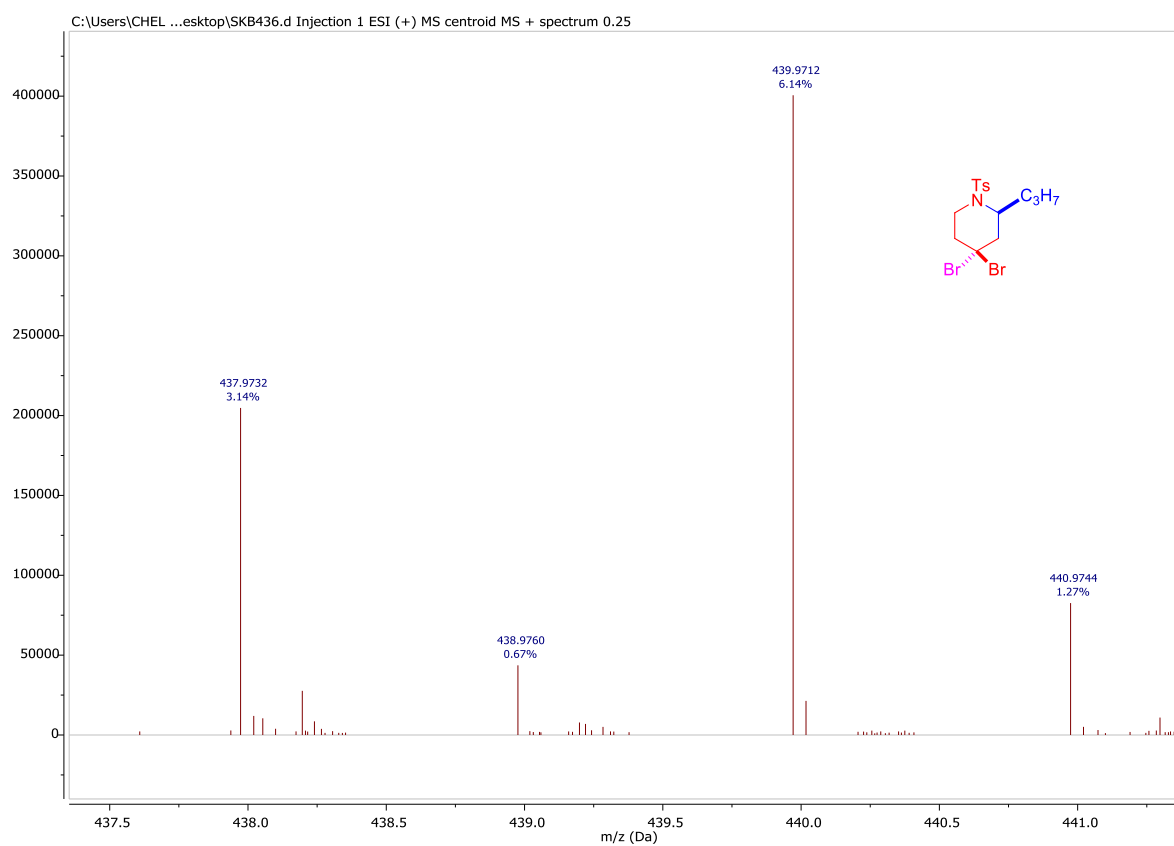

## HRMS spectrum of **3as**

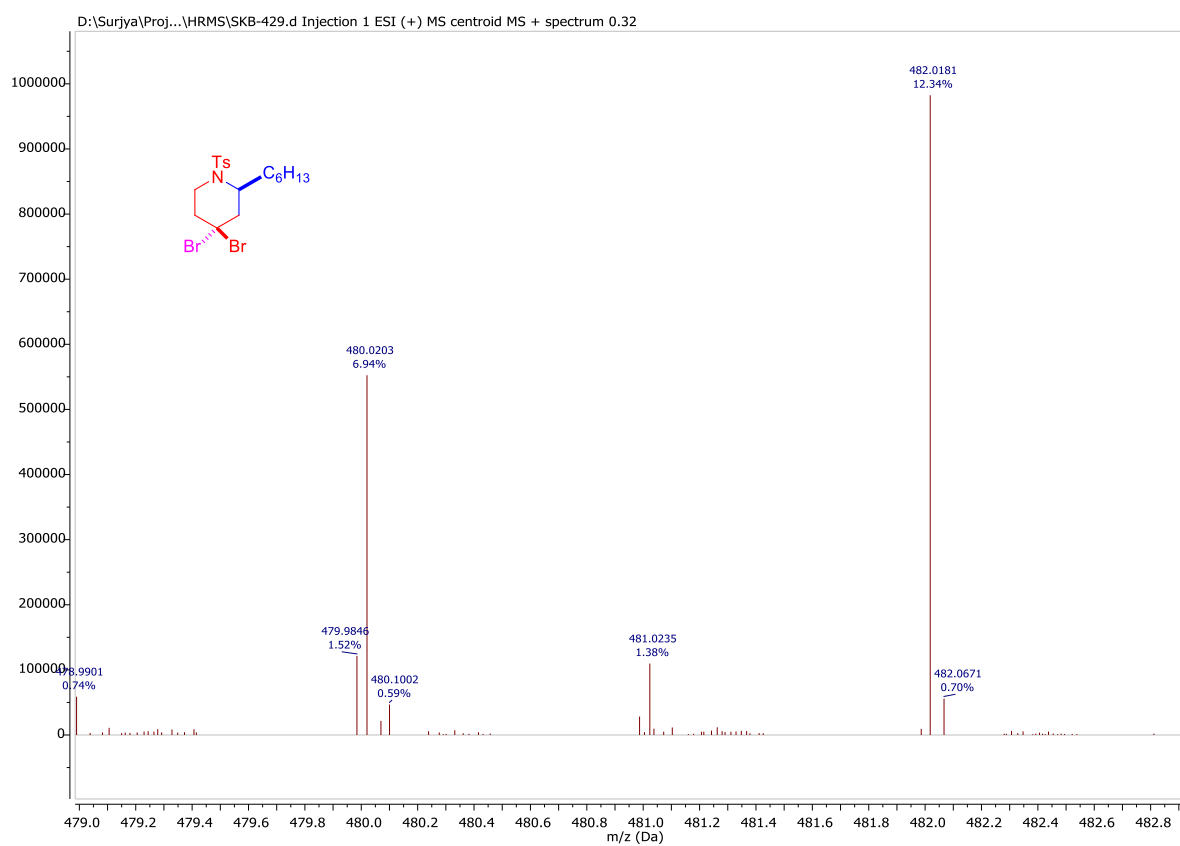

# HRMS spectrum of **3at**

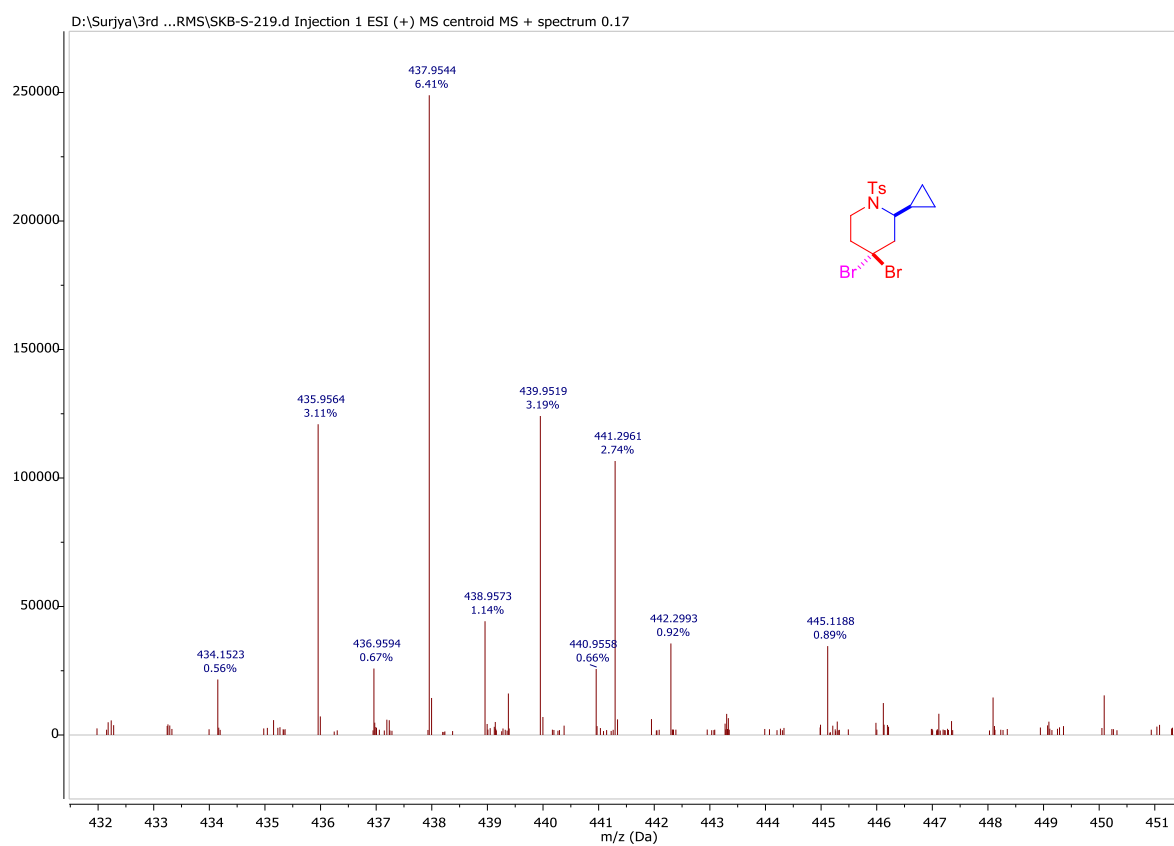

## HRMS spectrum of **3au**

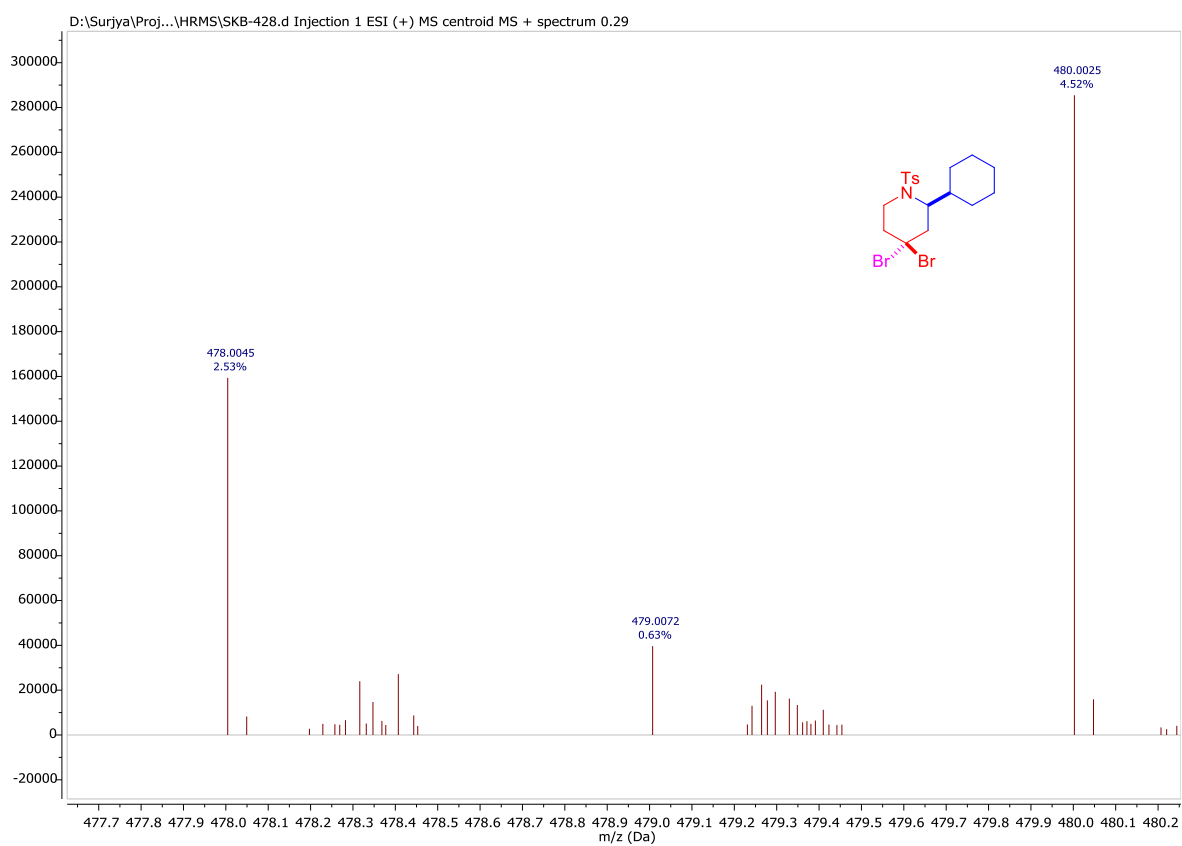

# HRMS spectrum of **3dj**

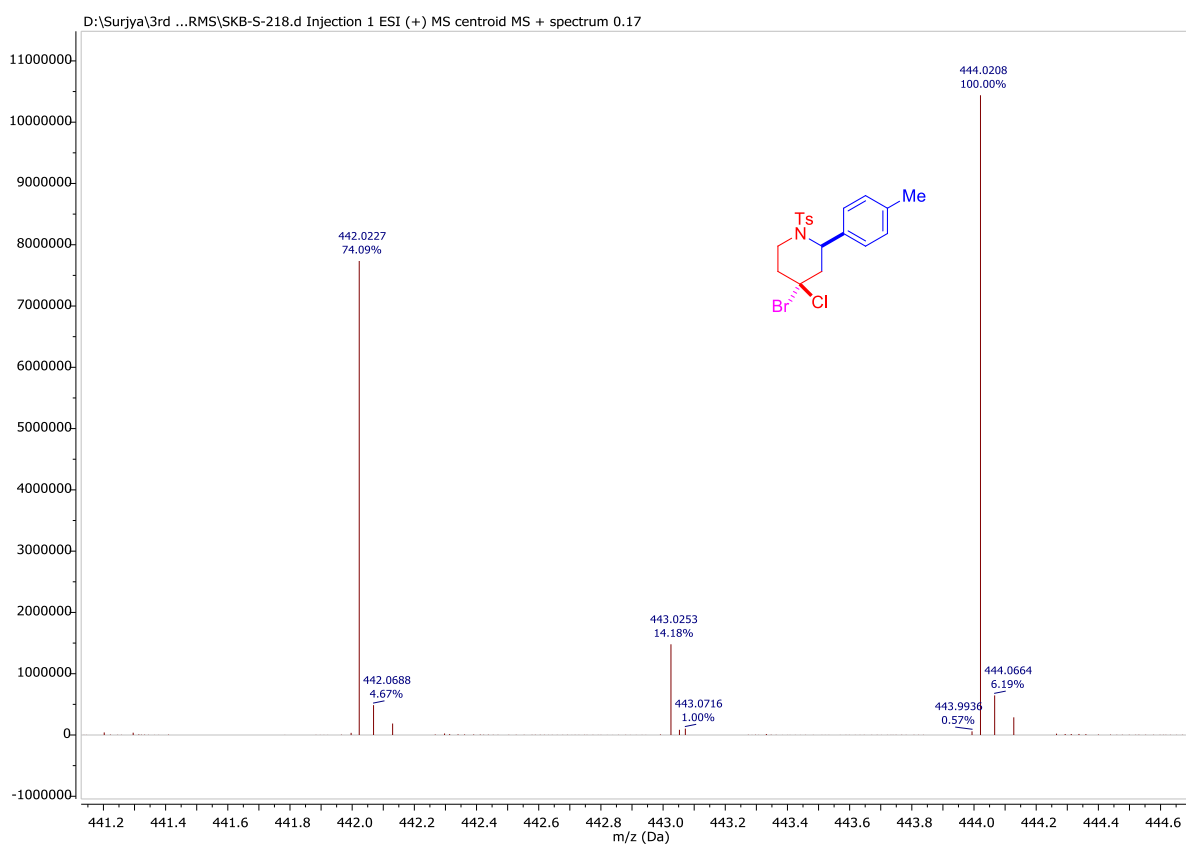

# HRMS spectrum of **3ed**

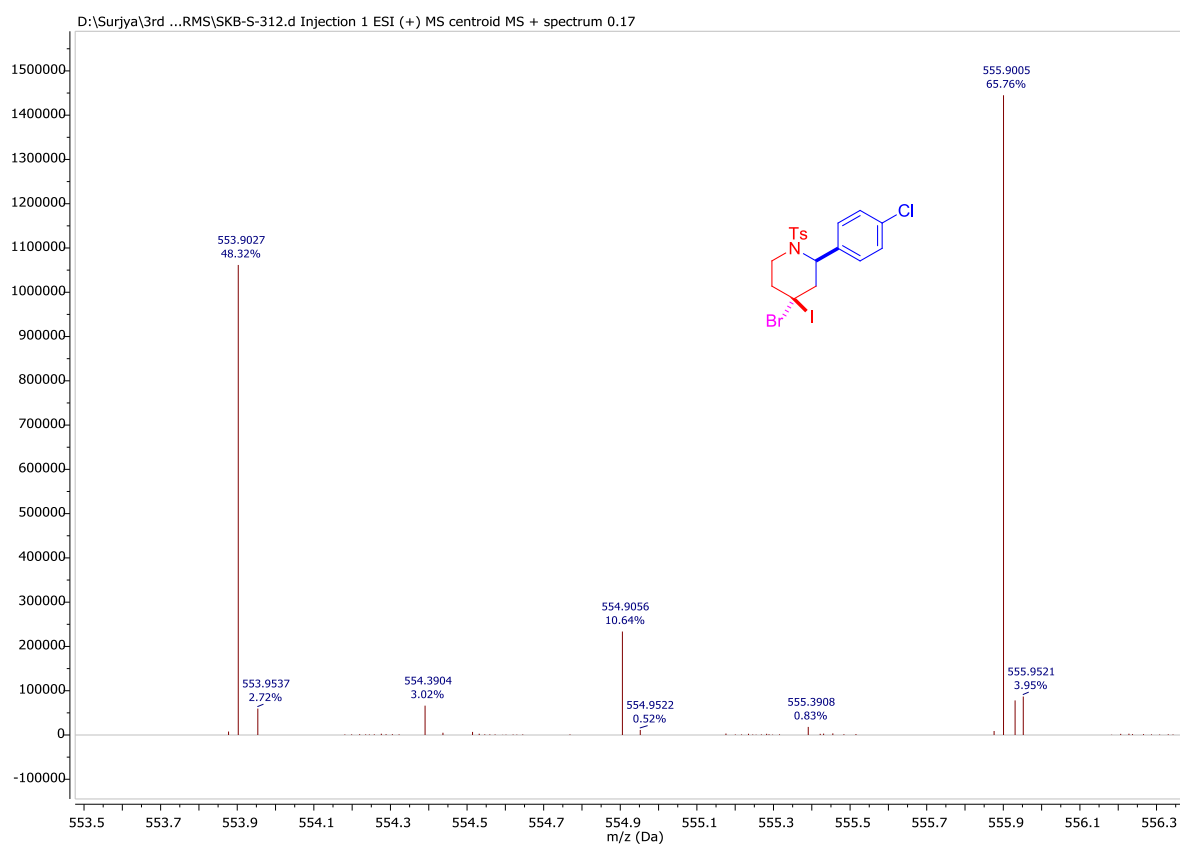

# HRMS spectrum of **4aa**

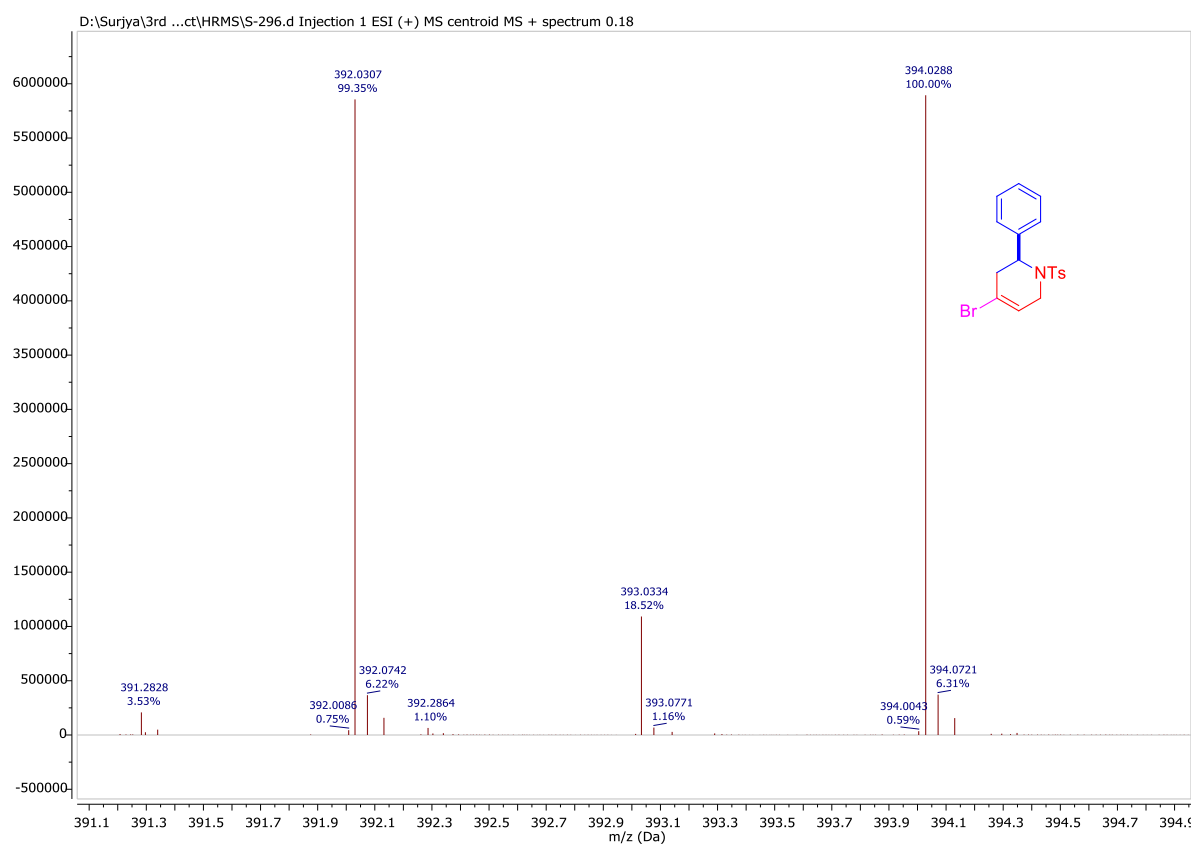



## HRMS spectrum of **4ac**

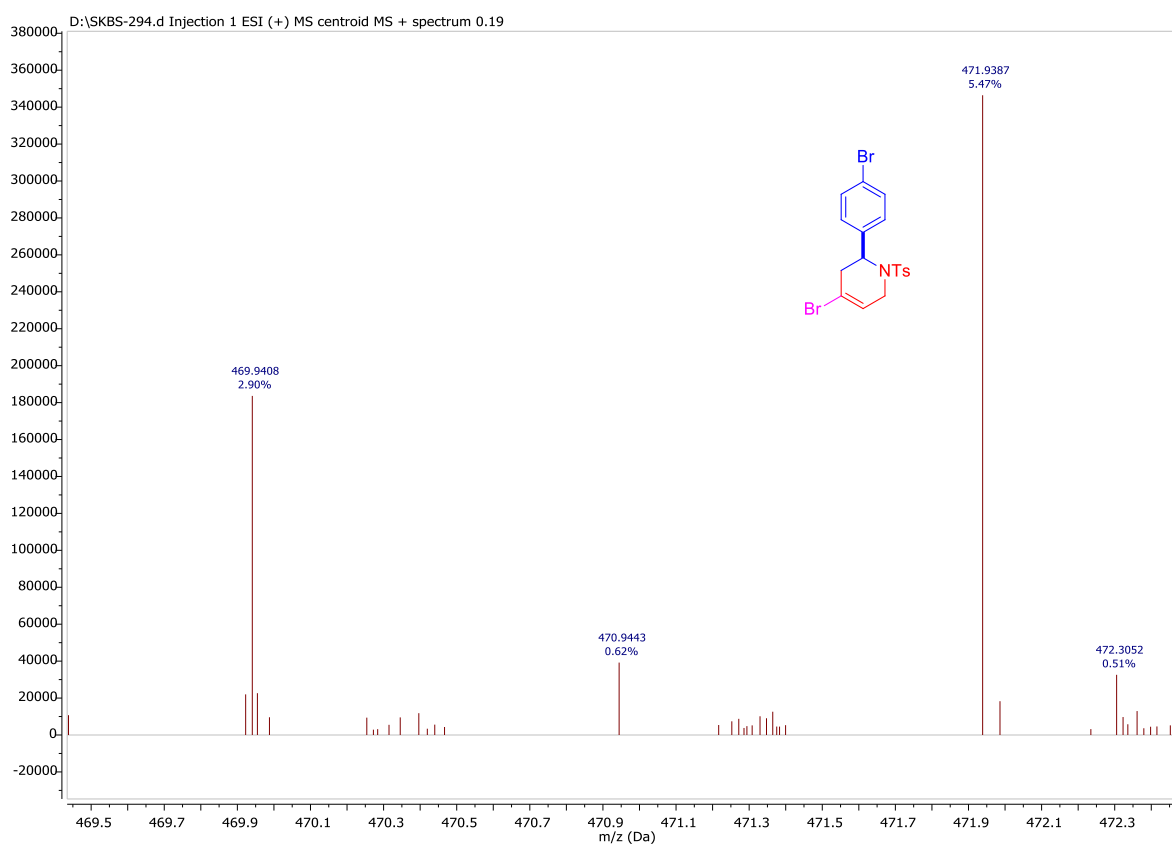

## HRMS spectrum of **4ad**

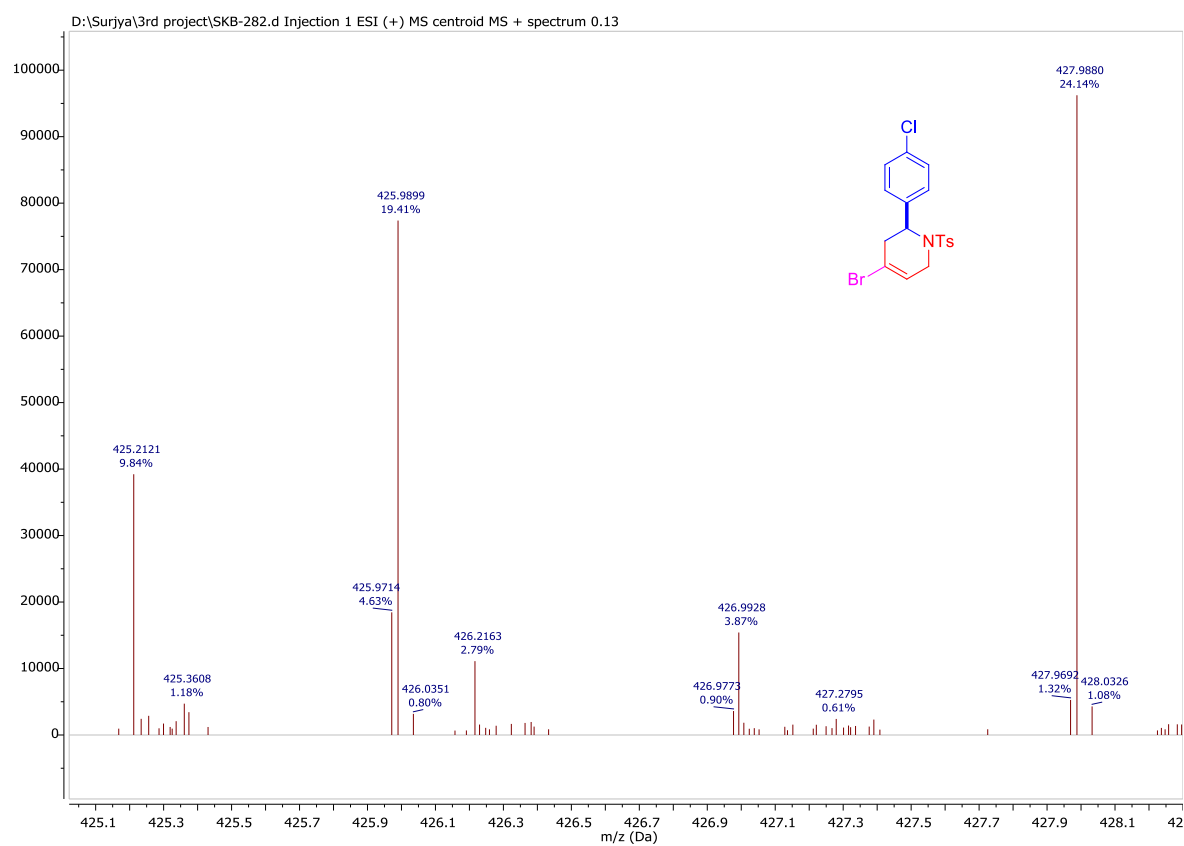

## HRMS spectrum of **4ai**

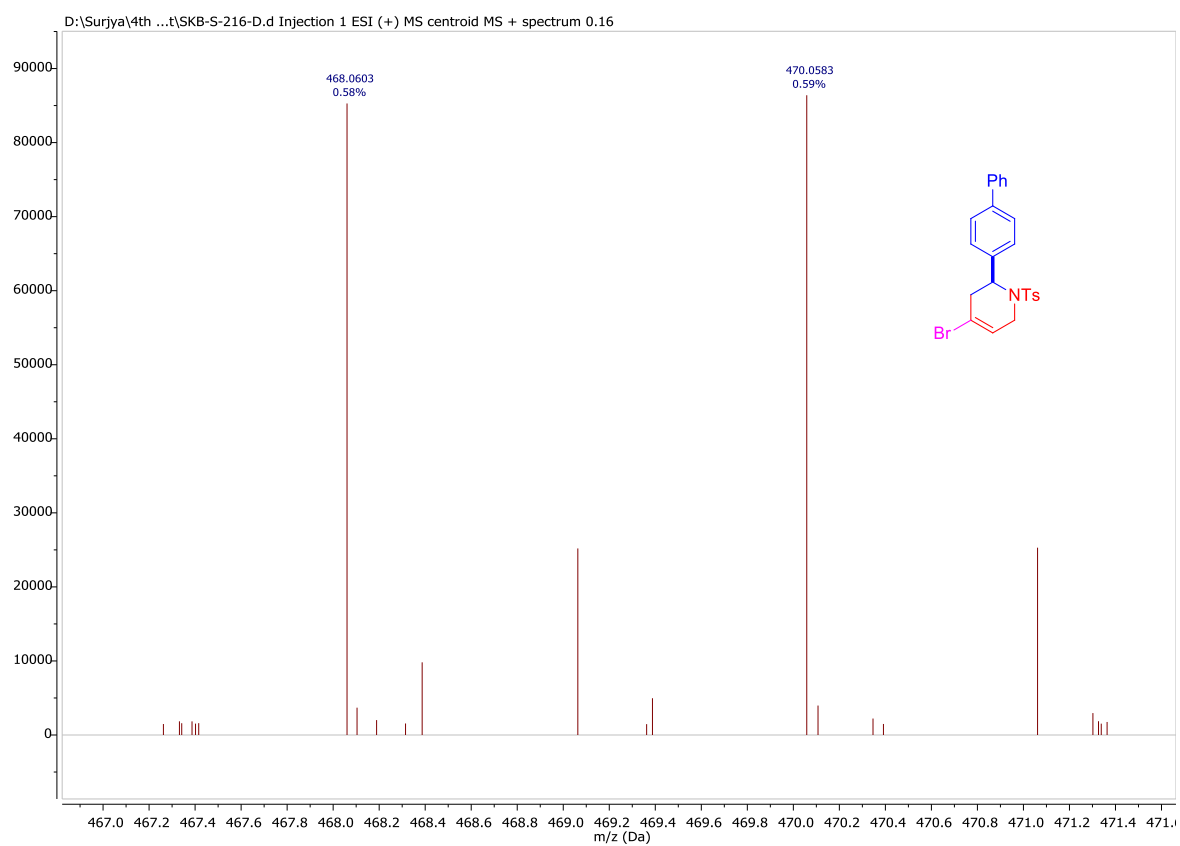

## HRMS spectrum of **4aj**

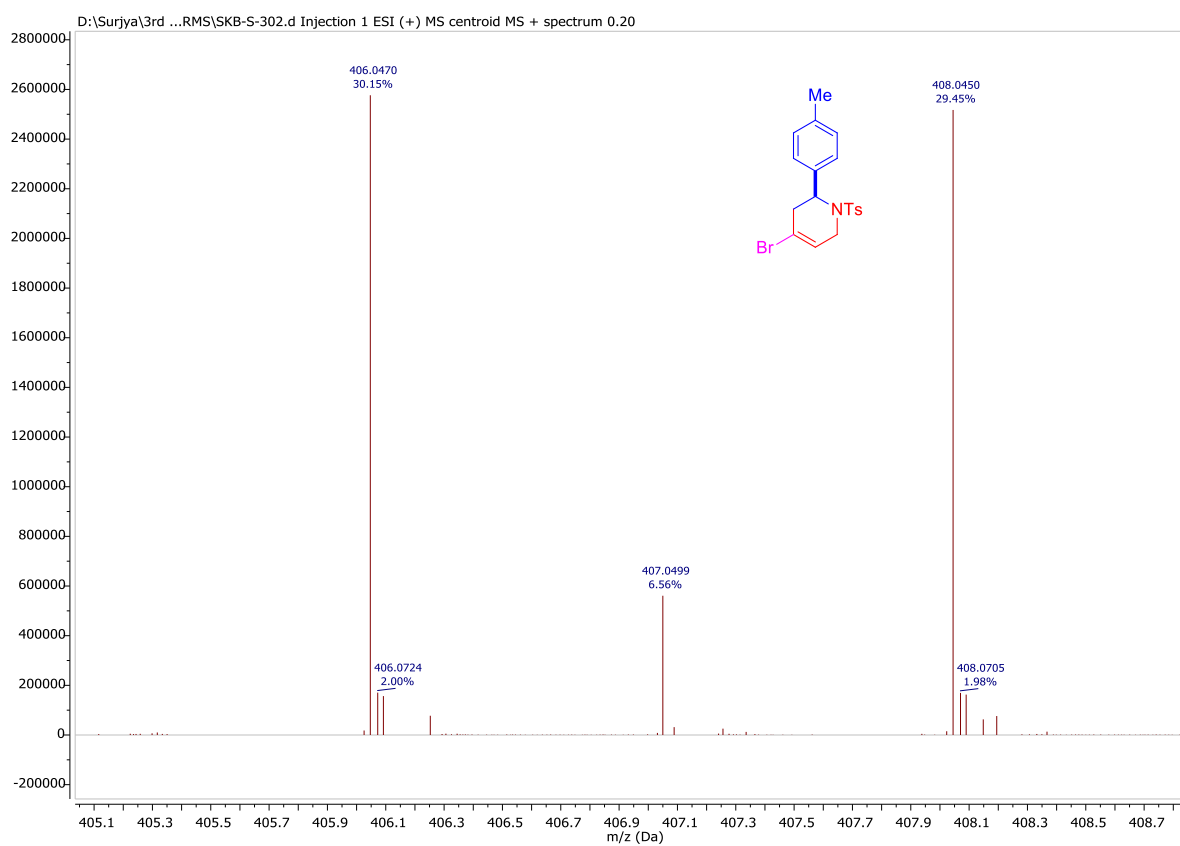

## HRMS spectrum of **4an**

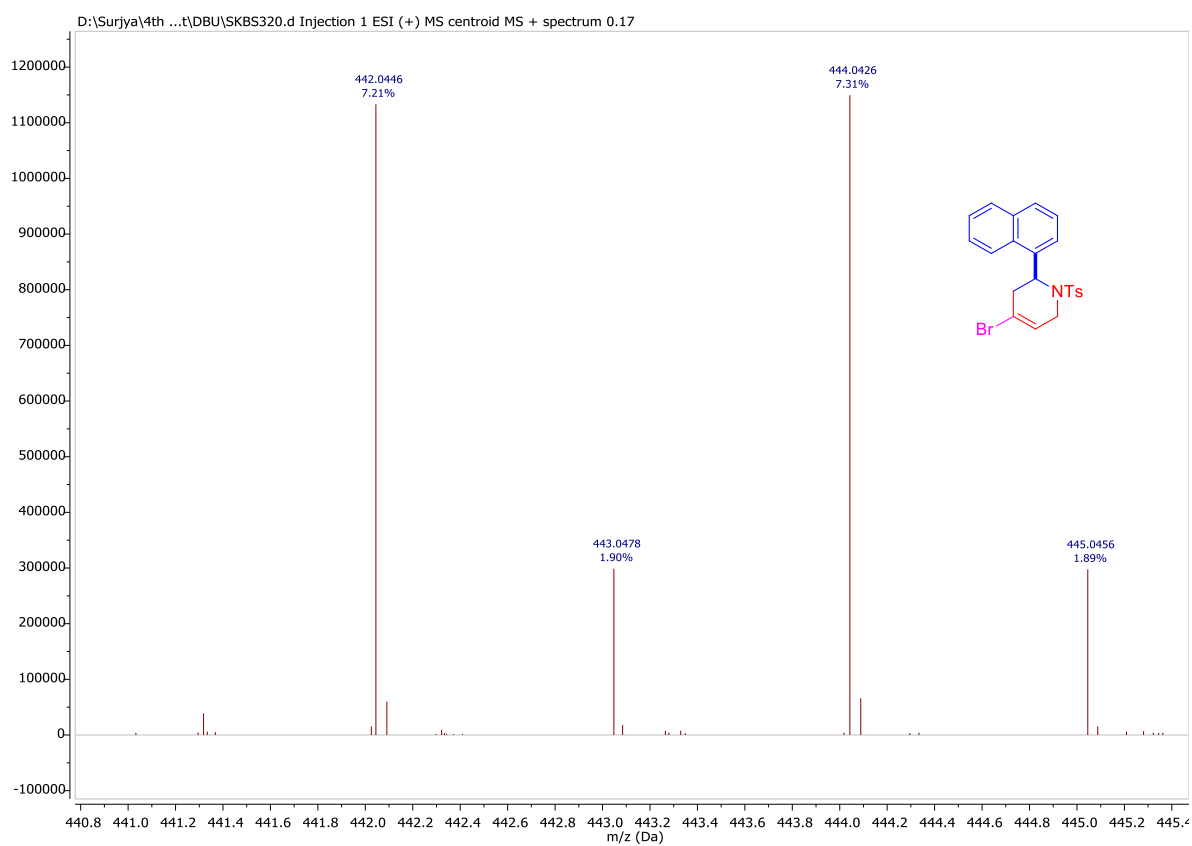

# HRMS spectrum of **4aq**

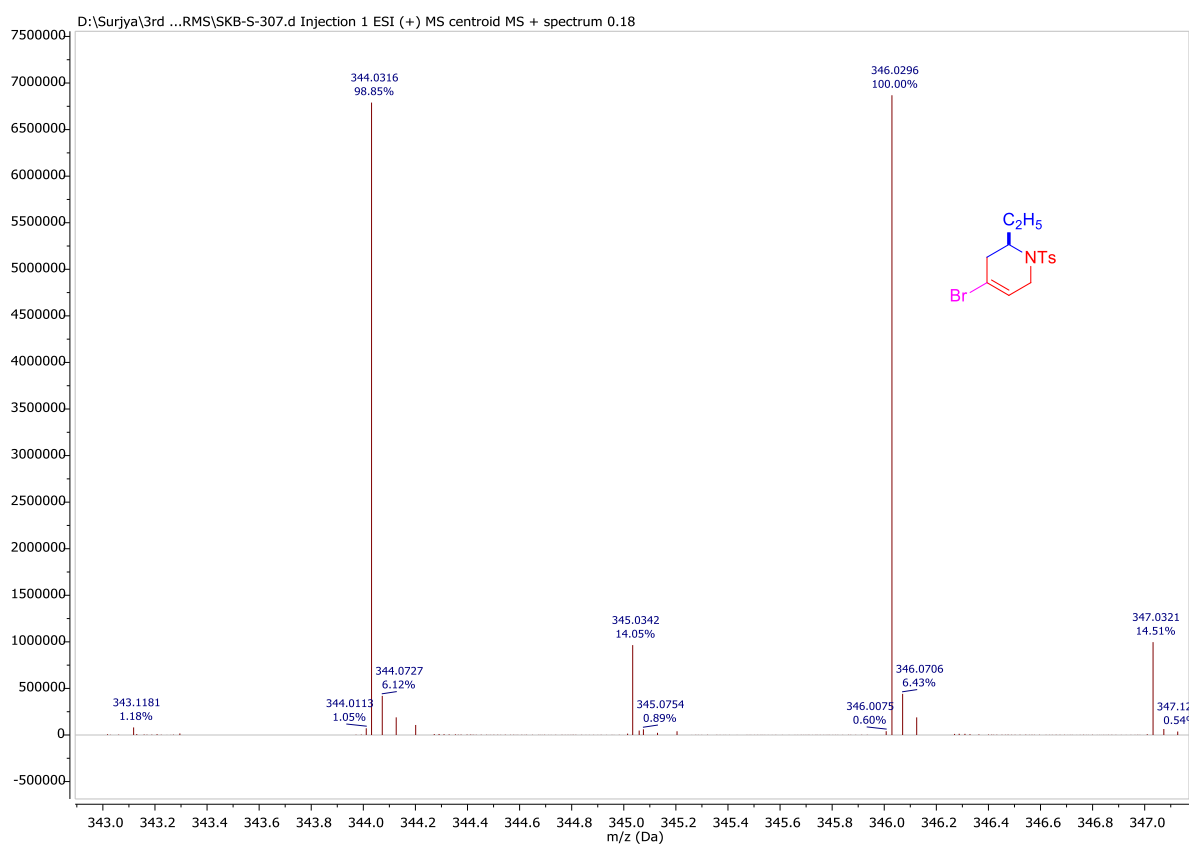

## HRMS spectrum of **4db**

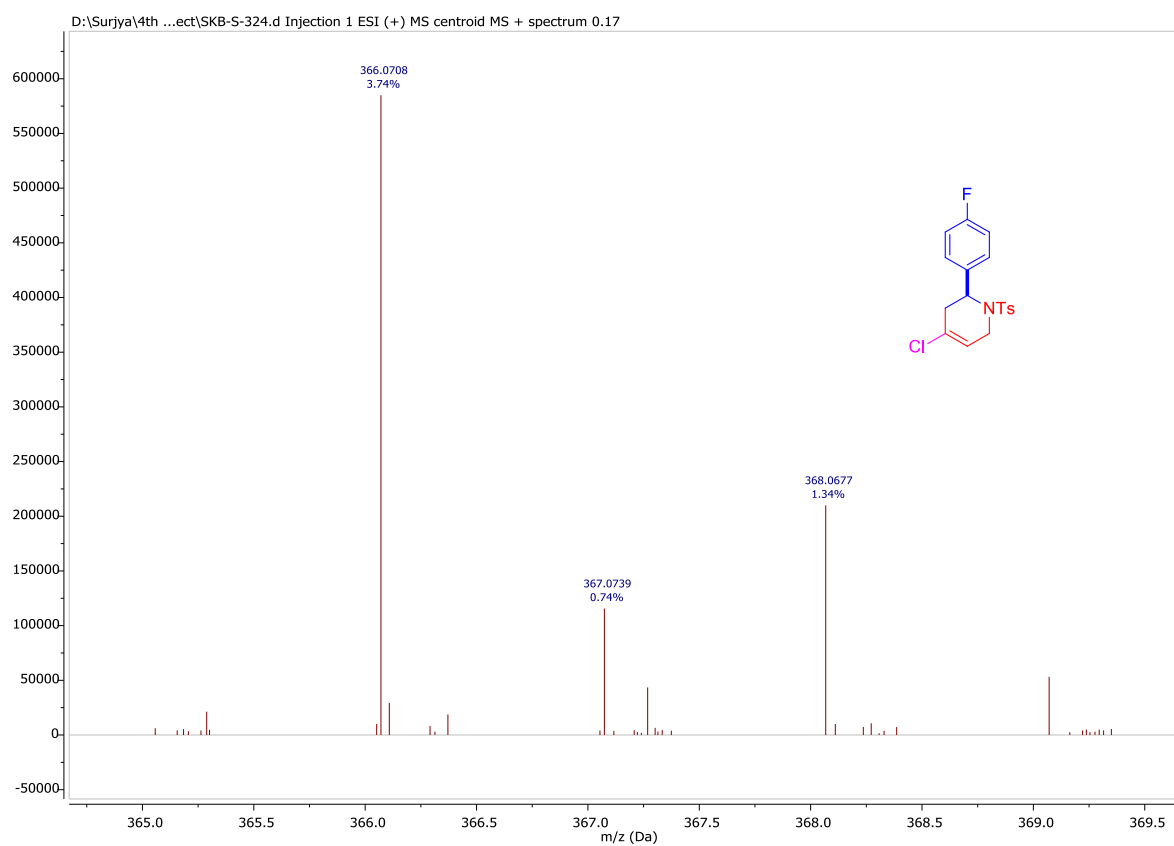

## HRMS spectrum of **4de**

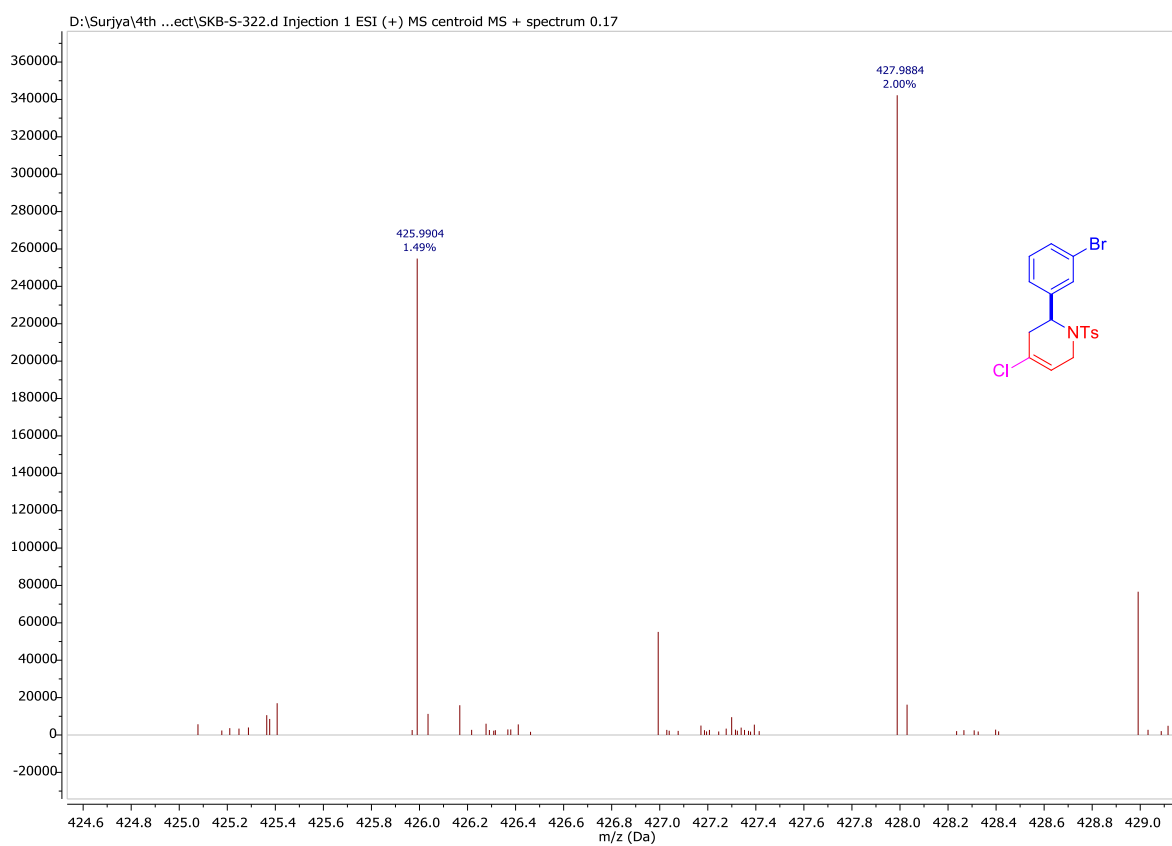



## HRMS spectrum of **4dj**

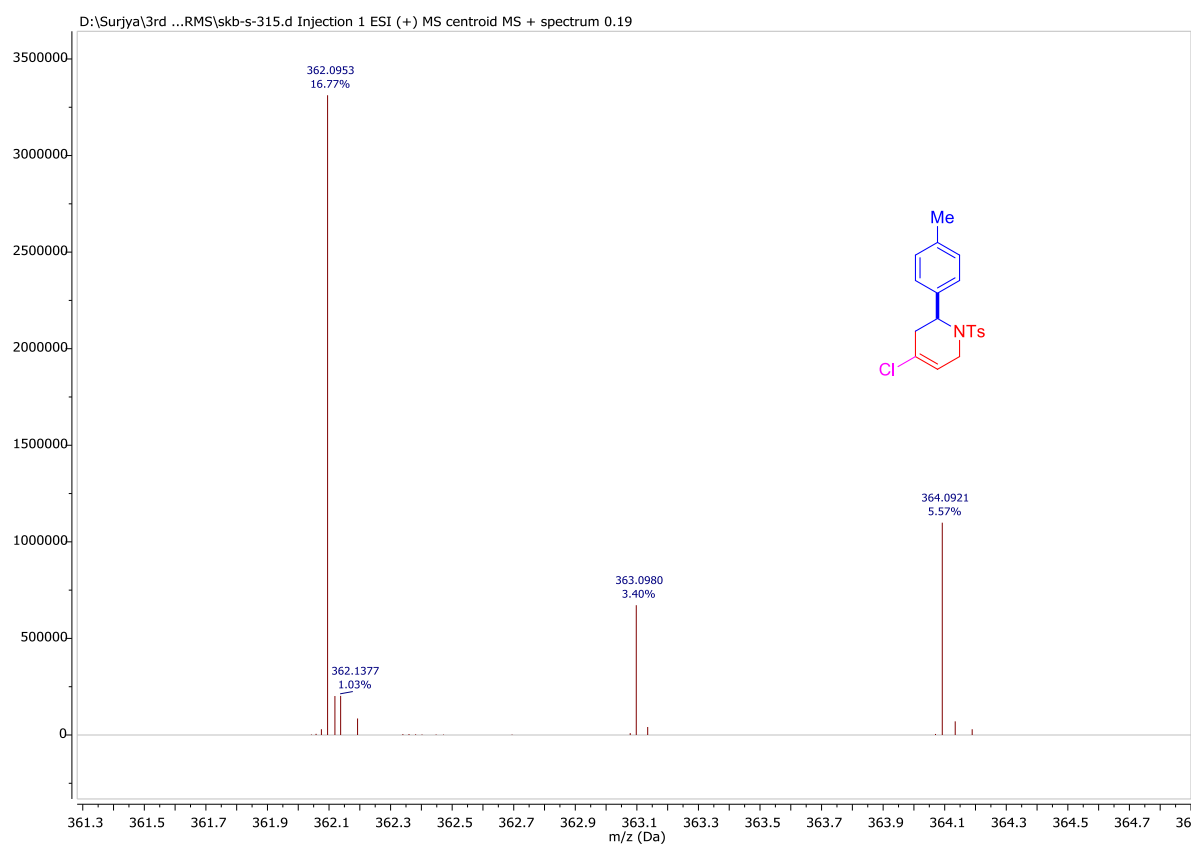

## HRMS spectrum of **5a**

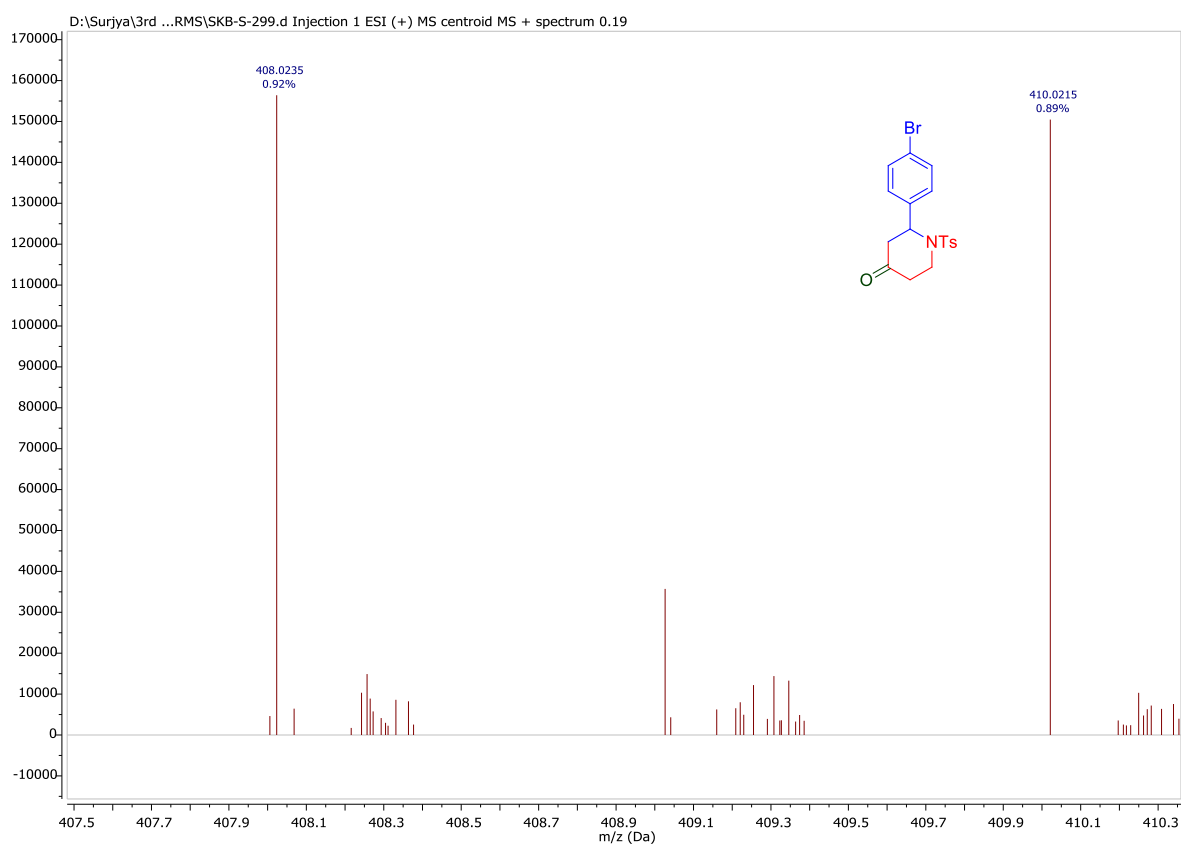

## HRMS spectrum of **6a**

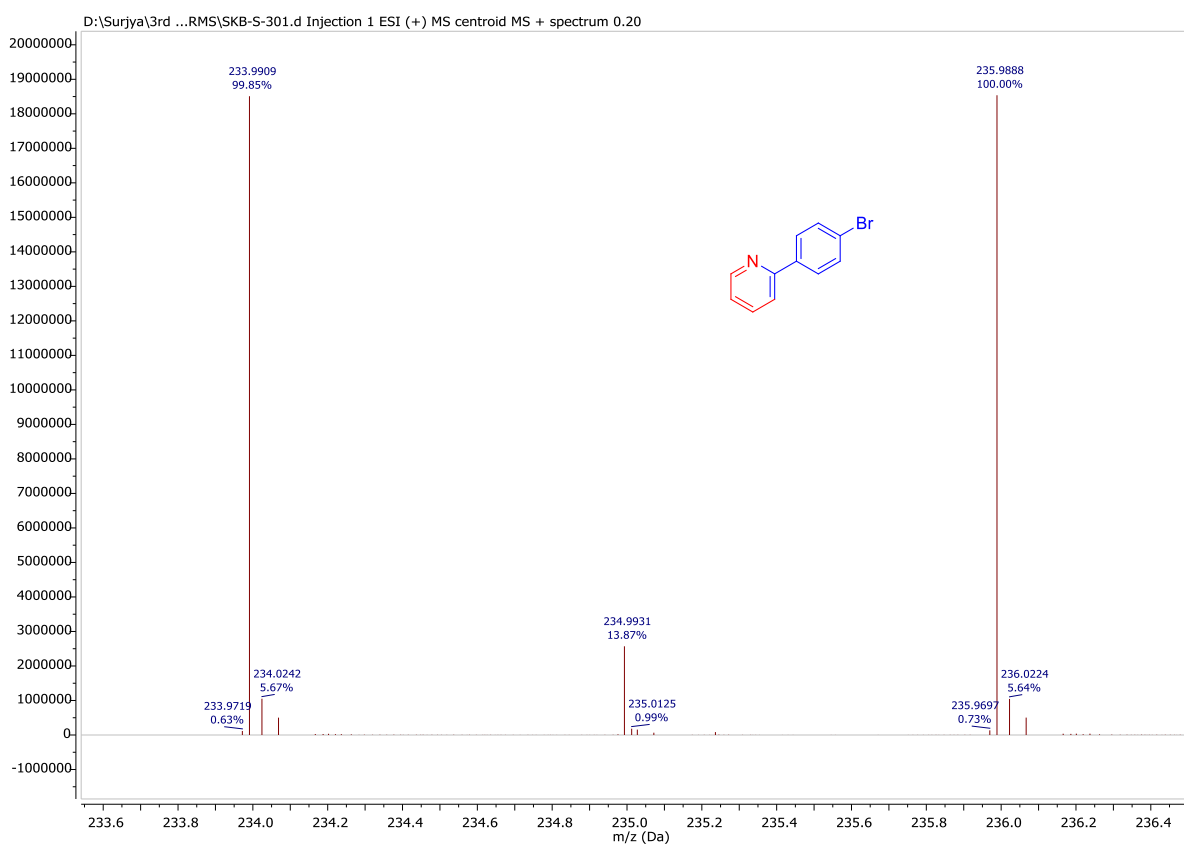

## HRMS spectrum of **7**

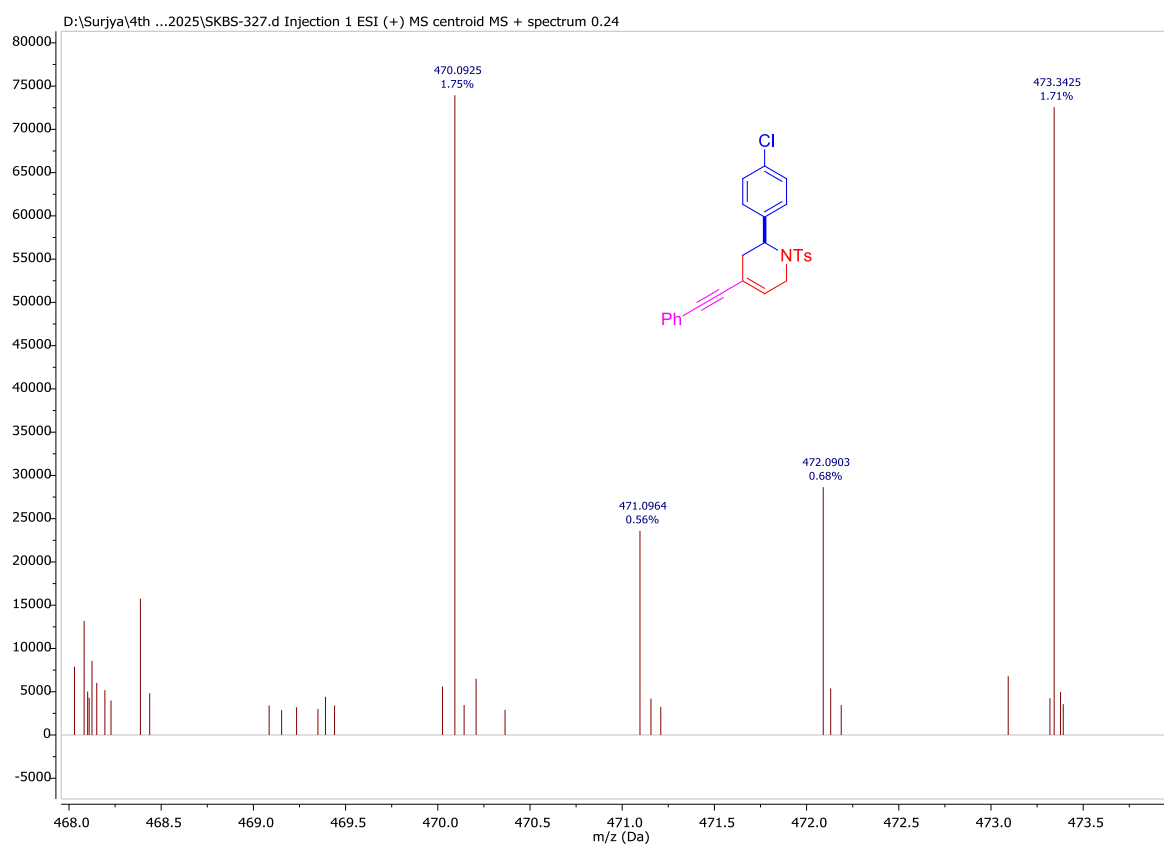

Supplement: d5ra03630e2.pdf [file d5ra03630e2.pdf]
